1

2

3

4

## **Cortisol levels after cold exposure are independent of**

5

## **adrenocorticotrophic hormone stimulation**

6

7 Alissa Shida<sup>1\*</sup>, Tomoya Ikeda<sup>1,2</sup>, Naoto Tani<sup>1,2</sup>, Fumiya Morioka<sup>1</sup>, Yayoi Aoki<sup>1</sup>, Kei

8 Ikeda<sup>1</sup>, Miho Watanabe<sup>1,3</sup>, Takaki Ishikawa<sup>1,2</sup>

9

10

11

12 <sup>1</sup> Department of Legal Medicine, Osaka City University Medical School, Osaka, Japan

13 <sup>2</sup> Forensic Autopsy Section, Medico-legal Consultation and Postmortem Investigation

14 Support Center (MLCPI-SC), Osaka, Japan

15 <sup>3</sup> Laboratory of Clinical Regenerative Medicine Department of Neurosurgery, Faculty of

16 Medicine, University of Tsukuba, Health and Medical Science Innovation laboratory 403,

17 Tsukuba-City, Ibaraki, Japan

18

19 \*Corresponding author

20 E-mail: [shida.alissa@med.osaka-cu.ac.jp](mailto:shida.alissa@med.osaka-cu.ac.jp) (AS)

21

## 1 **Abstract**

2 We previously showed that postmortem serum levels of adrenocorticotrophic hormone  
3 (ACTH) were significantly higher in cases of hypothermia (cold exposure) than other  
4 causes of death. This study examined how the human hypothalamic-pituitary-adrenal axis,  
5 and specifically cortisol, responds to hypothermia. *Human samples:* Autopsies on 205  
6 subjects (147 men and 58 women; age 15-98 years, median 60 years) were performed  
7 within 3 days of death. Cause of death was classified as either hypothermia (cold exposure,  
8  $n=14$ ) or non-cold exposure (controls;  $n=191$ ). Cortisol levels were determined in blood  
9 samples obtained from the left and right cardiac chambers and common iliac veins using  
10 a chemiluminescent enzyme immunoassay. Adrenal gland tissue samples were stained  
11 for cortisol using a rabbit anti-human polyclonal antibody. *Cell culture:* AtT20, a mouse  
12 ACTH secretory cell line, and Y-1, a corticosterone secretory cell line derived from a  
13 mouse adrenal tumor, were analyzed in mono- and co-culture, and time courses of ACTH  
14 (in AtT20) and corticosterone (in Y-1) secretion were assessed after low temperature  
15 exposure mimicking hypothermia and compared with data for samples collected  
16 postmortem for other causes of death. However, no correlation between ACTH  
17 concentration and cortisol levels was observed in hypothermia cases. Immunohistologic  
18 analyses of samples from hypothermia cases showed that cortisol staining was localized

19 primarily to the nucleus rather than the cytoplasm of cells in the zona fasciculata of the  
20 adrenal gland. During both mono-culture and co-culture, AtT20 cells secreted high levels  
21 of ACTH after 10-15 minutes of cold exposure, whereas corticosterone secretion by Y-1  
22 cells increased slowly during the first 15-20 minutes of cold exposure. Similar to autopsy  
23 results, no correlation was detected between ACTH levels and corticosterone secretion,  
24 either in mono-culture or co-culture experiments. These results suggested that ACTH-  
25 independent cortisol secretion may function as a stress response during cold exposure.

26

## 27 **Introduction**

28 Many reports have documented the pathologic changes observed in humans  
29 affected by hypothermia due to cold exposure, and “classic” morphologic findings  
30 supporting a diagnosis of hypothermia have been established [1-7]. However, as other  
31 etiologies of hypothermia include drug abuse, dementia, malnutrition, and infectious  
32 disease, only a few studies have specifically examined pathologic findings after cold  
33 exposure [8,9], especially from a biochemical perspective, such as the presence and levels  
34 of ketone bodies [10-13]. Furthermore, only a few reports have estimated hormone levels  
35 as part of the pathophysiologic findings of cold exposure [14-16].

36           The primary stress response system is the sympathetic/adrenomedullary (S/A)  
37 system, which includes the chromogranin A [14] and hypothalamic-pituitary-adrenal  
38 (HPA) axis [16, 18]. Previous studies have suggested that postmortem serum  
39 adrenocorticotrophic hormone (ACTH) concentration is a useful biomarker of death due  
40 to cold exposure and the magnitude of physical stress responses during cold exposure  
41 [17]. Increased serum concentrations of ACTH associated with activation of the HPA axis  
42 and S/A system can be biochemically evaluated by measuring catecholamine and  
43 chromogranin A levels [19-23]. With respect to the HPA axis, it is known that cortisol  
44 levels are correlated with ACTH levels, and a precursor of cortisol, which is an activator,  
45 also inactivates cortisone accounting for 4-5% and corticosterone exhibiting only weak  
46 activity [24, 25]. Thus, this study evaluated cortisol as a biomarker of cold exposure-  
47 related stress by analyzing cases of human death due to hypothermia. We also assessed  
48 the relationship between ACTH and corticosterone levels during cold exposure using a  
49 mouse cell culture model.

50

## 51 **Material and Methods**

### 52 **Autopsy samples**

53 Autopsies were performed within 3 days postmortem at our institute. The study  
 54 included 205 serial cases (147 men and 58 women), and the median age was 60 years  
 55 (range 15-98 years). Cortisol levels were determined in blood samples collected  
 56 aseptically from the left and right cardiac chambers and the common iliac vein using  
 57 syringes.

58 Cause of death was determined based on findings from a complete autopsy as  
 59 well as macromorphological, micropathologic, and toxicologic examinations. Cases were  
 60 classified as either hypothermia (cold exposure,  $n=14$ ) or control. Cause of death in the  
 61 latter group included blunt injury ( $n=37$  total; head injury [ $n=28$ ], non-head injury [ $n=$   
 62  $=9$ ]), sharp-instrument injury ( $n=8$ ), fire fatality ( $n=43$ ), asphyxia ( $n=28$ ), intoxication  
 63 ( $n=12$  total; methamphetamine-related fatality [ $n=3$ ], psychotropic drugs [ $n=6$ ], other [ $n=$   
 64  $=3$ ]), drowning ( $n=12$ ), hyperthermia (heat stroke,  $n=10$ ), acute ischemic heart disease  
 65 ( $n=20$ ), and natural causes ( $n=22$ ). Case profiles are shown in Table1.

66 **Table1. Case profile.**

| Cause of Death | Number | Gender (male/female) | Age-structure (mean) | Survival period (mean) | Postmortem period (mean, | Hospitalization (male/female) |
|----------------|--------|----------------------|----------------------|------------------------|--------------------------|-------------------------------|
|                |        |                      |                      |                        |                          |                               |

|                                     |     |        |                 | n,<br>h)α                          | h)α               |      |
|-------------------------------------|-----|--------|-----------------|------------------------------------|-------------------|------|
| Hypothermiaα                        | 14α | 9/5α   | 34-89¶<br>(62)α | 6-24¶<br>(18)α                     | 24-72¶<br>(52.6)α | 0/0α |
| Blunt injury ¶<br>(head injury)α    | 28α | 19/9α  | 15-98¶<br>(66)α | <0.5-<br>1056<br>¶<br>(128.<br>7)α | 12-60¶<br>(29.3)α | 9/6α |
| Blunt injury¶<br>(non-head injury)α | 9α  | 9/0α   | 52-85¶<br>(67)α | <0.5-<br>960¶<br>(122.<br>6)α      | 24-60¶<br>(30.6)α | 4/0α |
| Sharp instrument injuryα            | 8α  | 7/1α   | 40-85¶<br>(67)α | <0.5-<br>24¶<br>(6.3)<br>α         | 12-36¶<br>(27.4)α | 3/1α |
| Fire fatalityα                      | 43α | 34/10α | 28-95¶<br>(73)α | <0.5-<br>3600<br>¶<br>(142.<br>4)α | 12-60¶<br>(27.8)α | 6/2α |
| Asphyxiaα                           | 29α | 19/10α | 21-83¶          | <0.5-                              | 12-60¶            | 4/2α |

|                                                |             |               |                                    |                                                      |                                      |              |
|------------------------------------------------|-------------|---------------|------------------------------------|------------------------------------------------------|--------------------------------------|--------------|
|                                                |             |               | (57) $\alpha$                      | 240 $\parallel$<br>(23.7) $\alpha$                   | (33.4) $\alpha$                      |              |
| Intoxicatio<br>n $\alpha$                      | 11 $\alpha$ | 8/3 $\alpha$  | 25-59 $\parallel$<br>(38) $\alpha$ | <0.5-<br>48 $\parallel$<br>(11) $\alpha$             | 12-36 $\parallel$<br>(32.7) $\alpha$ | 0/1 $\alpha$ |
| Drowning $\alpha$                              | 11 $\alpha$ | 7/4 $\alpha$  | 44-85 $\parallel$<br>(62) $\alpha$ | <0.5-<br>2 $\parallel$<br>(3) $\alpha$               | 12-48 $\parallel$<br>(29.6) $\alpha$ | 0/0 $\alpha$ |
| Hyperther<br>mia $\alpha$                      | 10 $\alpha$ | 3/7 $\alpha$  | 28-92 $\parallel$<br>(70) $\alpha$ | 6-<br>240 $\parallel$<br>(33.1) $\alpha$             | 24-48 $\parallel$<br>(32.7) $\alpha$ | 2/1 $\alpha$ |
| Acute<br>ischemic<br>heart<br>disease $\alpha$ | 20 $\alpha$ | 19/1 $\alpha$ | 19-88 $\parallel$<br>(61) $\alpha$ | <0.5-<br>144 $\parallel$<br>(16.5) $\alpha$          | 6-60 $\parallel$<br>(33.6) $\alpha$  | 1/1 $\alpha$ |
| Other<br>natural<br>death $\alpha$             | 22 $\alpha$ | 14/8 $\alpha$ | 21-88 $\parallel$<br>(70) $\alpha$ | <0.5-<br>4320<br>$\parallel$<br>(243.<br>5) $\alpha$ | 24-48 $\parallel$<br>(29.2) $\alpha$ | 5/3 $\alpha$ |

67 <sup>a</sup>Methamphetamine-related fatalities, n=3; psychotropic drugs, n=5; others, n=3

68 Cases of hypo- and hyperthermia due to drug abuse and bathing, respectively, were  
69 excluded. Postmortem interval was defined as time elapsed from estimated time of death  
70 to autopsy, whereas survival period was defined as the time from the onset of fatal insult  
71 to death. Only clearly described cases were examined in this study.

72 Tissue specimens of the bilateral adrenal glands were collected and fixed in 4%  
73 paraformaldehyde in phosphate-buffered saline (PBS; pH 7.2) for histopathologic and  
74 immunohistochemical analyses.

75

## 76 **Biochemical analysis**

77 Blood samples were immediately centrifuged to prepare serum, and ACTH and  
78 cortisol levels were measured using an AIA-360<sup>®</sup> analyzer (TOSOH Bioscience GmbH,  
79 Griesheim, Germany) [27,28]. This analyzer utilizes a competitive fluorescent enzyme  
80 immunoassay format and is performed entirely within small, single-use test cups  
81 containing all necessary reagents. The analyte in the sample competes with the enzyme-  
82 labeled hormone and incubated with a fluorogenic substrate, 4-methylumbelliferyl  
83 phosphate. The amount of enzyme-labeled hormone that binds to the beads is inversely  
84 proportional to the hormone concentration in the test sample. Calibration, daily checks,  
85 and maintenance procedures were carried out as described in the Systems Operator's



86 Manual. Accurate performance data for human ACTH and cortisol, including analyte  
87 recovery and dilution studies, had been previously evaluated and were available in the  
88 manufacturer's technical bulletins. The time required to obtain the first result using this  
89 assay is 20 minutes, with additional results obtained every minute thereafter.

90 Serum samples (150 $\mu$ L each) were placed in the test cups, and both hormones  
91 were measured using the above-mentioned immunoassays. The lower (and upper)  
92 reported values for the ACTH and cortisol assays were 2.0 (2000.0) pg/mL and 28.0  
93 (1656.0) nmol/L, respectively.

94

## 95 **Oxyhemoglobin measurement**

96 Blood oxyhemoglobin was determined using a CO-oximeter system  
97 (ABL80FLEX System; Radiometer Corp., Tokyo, Japan) in hypothermia patients [29,  
98 30]. Blood alcohol levels were determined using headspace gas chromatography/mass  
99 spectrometry (GC/MS), and amphetamine and psychotropic drugs were detected by  
100 GC/MS [17].

101

## 102 **Immunohistochemistry**

103 Harvested adrenal glands were fixed in 4% paraformaldehyde in PBS (pH 7.2) for 12 h,  
104 embedded in paraffin, and sectioned at a thickness of 4 $\mu$ m. Deparaffinization (Sakura  
105 tissue TEK DRS 2000, Tokyo, Japan) of each section was followed by heat-mediated  
106 antigen retrieval in citrate buffer (pH7.0) for 10min, after which each section was  
107 immersed in 0.3% H<sub>2</sub>O<sub>2</sub>-methanol for 10 min to inactivate endogenous peroxidases. After  
108 washing in PBS for 5 min, slides were incubated overnight with anti-cortisol-binding  
109 globulin antibody (ab107368; Abcam). Immunoreactivity was visualized by the polymer  
110 method using Dako Envision+ Dual Link System-HRP (K4063; Dako, CA, USA) and the  
111 Dako liquid DAB+ Substrate Chromogen System (K3468; Dako), according to the  
112 manufacturer's instructions and with hematoxylin counterstaining [13, 17]. The total  
113 number of cells in the adrenal gland and number of cells exhibiting cytoplasmic or nuclear  
114 cortisol immunoreactivity were determined microscopically under 400 $\times$  magnification.  
115 Three random fields were independently enumerated, and the data are presented as  
116 number of cortisol-positive cells (cytoplasm or nucleus, respectively)/ total number of  
117 adrenal gland cells $\times$ 100. As cells in the zona fasciculata of the adrenal gland are known  
118 to produce cortisol in the cytoplasm, immunostaining for cortisol in each group was  
119 evaluated by technicians blinded to sample grouping. Three sections were randomly  
120 selected for cell counting [31, 32].

121

## 122 **Cell culture models**

### 123 *Mono-culture models of pituitary and adrenal cells*

124 Mono-culture models of ACTH-secreting AtT20 pituitary cells [33-37] and  
125 corticosterone-secreting Y-1 adrenal cells [38-42] derived from mice were developed to  
126 verify whether these cells secrete hormones only upon stimulation by exposure to cold.  
127 For both cell types (AtT20 and Y-1), the culture medium consisted of a 1:1 ratio of  
128 DMEM-F12 and 15% charcoal stripped fetal bovine serum (FBS; Biological  
129 Industries,CT.,USA) with 4mM L-glutamine, 50 U/mL penicillin, and 50 µg/ml  
130 streptomycin. Initially, cells of both types were seeded and cultured at 37°C. Growth was  
131 controlled at 54,618 cells/cm<sup>2</sup> for AtT20 and 57,803 cells/cm<sup>2</sup> for Y-1, and the cells were  
132 allowed to proliferate until they covered the surface of the culture dishes. The culture  
133 medium for Y-1 cells was replaced once every 2 days. Once the AtT20 and Y-1 cells  
134 reached confluence, they were transferred to 4°C and maintained. The amount of ACTH  
135 and corticosterone in the culture medium was measured at 5, 10, 15, 20, 30, 40, 60, 180,  
136 and 360 min; at 12 and 24 h; and at 3 and 5 days. ACTH was measured using a mouse  
137 ACTH assay kit (FEK-001-21; Phoenix Pharmaceuticals, Inc., USA) [43,44], and  
138 corticosterone was measured using a mouse corticosterone assay kit (Assay MAX

139 EC3001-1; ANG, USA) [45-47]. At the end of the experiment, adherent cells were  
140 dissociated from the surface using trypsin and then counted; hormone concentrations  
141 were calculated using a correction formula and the measured values.

142

### 143 ***Co-culture model development***

144 We developed a co-culture system for AtT20 ACTH-secreting cells (ECACC no.  
145 87021902) [36,37] and Y-1 corticosterone-secreting cells derived from mice [45-47] as a  
146 model of the pituitary-adrenal system. The co-culture model was used to investigate  
147 whether these cells interact as part of the HPA axis during cold-stimulated hormone  
148 production. Both AtT20 and Y-1 cells were cultured in medium containing DMEM-F12  
149 supplemented with 15% inactivated FBS, 50 µg/ml streptomycin, 50 µM penicillin, and  
150 0.25 µg/ml fungizone. To inactivate ACTH included in the culture medium, 0.2 mL of  
151 rabbit anti-mouse ACTH (1-24) serum (Siemens, Immulyze) was added to 200 mL of  
152 culture medium, we decided about the proper amount of the rabbit serum using an ACTH  
153 ELISA kit (MDB, M046006) [48].

154 Initially, both AtT20 and Y-1 cells were cultured separately at 37°C, with AtT20  
155 and Y-1 cells on the top and bottom of the filter, respectively. The cells were then co-  
156 cultured at 4°C. The insert for 6-well plate (Greiner Bio-One, Frickenhausen, Germany)

157 used to separate the AtT20 and Y-1 cells had a diameter of 23.1 mm, pore size of 3.0  $\mu\text{m}$ ,  
158 and pore density of  $2 \times 10^6$  pores/ $\text{cm}^2$ . Initially, corticosterone-secreting Y-1 cells were  
159 cultured on the bottom of the filter with the filter placed upside down so that the cells  
160 formed a mono layer. Subsequently, the filter was placed upright in the culture medium.  
161 Schroten H, (2016) established this method in a choroid plexus model [49-53], and we  
162 previously described this method in a report on the physiologic significance of the blood-  
163 cerebrospinal fluid barrier and prolactin [54].

164 Excessive growth on the filter was controlled by trypsinization to maintain a  
165 single layer of cells; the number of Y-1 cells on the filter was limited to 57,803/ $\text{cm}^2$ . As  
166 the Y-1 cells formed tight junctions, movement of ACTH between the cells was  
167 prevented. Thereafter, the culture medium was replaced once every 2 days. Once  
168 culturing of the Y-1 cells was complete, AtT20 (ACTH secreting) cells were similarly  
169 grown on the other side of the filter (i.e., the side opposite to Y-1 cells). The filter was  
170 immersed in the culture medium by placing the ACTH-secreting (AtT20) cells side facing  
171 up and corticosterone-secreting (Y-1) cells side facing down. Levels of ACTH and  
172 corticosterone in the culture medium were measured at 5, 10, 15, 20, 30, 40, and 60 min,  
173 as indicated above. After measurement of both hormones, the adherent cells were

174 dissociated from the filter using trypsin and counted. Accurate hormone concentrations  
175 were calculated using a correction formula and the measured values.

176

## 177 **Statistical analysis**

178 For comparisons between groups, we used the nonparametric Mann-Whitney *U*  
179 test. The Games-Howell test was used for analyses involving multiple comparisons. All  
180 analyses were performed using Microsoft Excel and IBM SPSS statistic viewer 24. Lines  
181 in each box represent the median, whereas lines outside each box represent the 90%  
182 confidence interval. The sensitivity and specificity for distinguishing between two groups  
183 using cut-off cortisol values based on blood collection site (i.e., left and right cardiac  
184 chambers and common iliac veins) were estimated using receiver operating characteristic  
185 (ROC) curve analysis. Areas under the curve were calculated and analyzed using a 1-  
186 tailed test. The optimal compromise between sensitivity and specificity was determined  
187 graphically.

188

## 189 **Ethics statement**

190           This study was evaluated by the Independent Ethics Committee of the Osaka  
191 City University Graduate School of Medicine, which approved opt-out for informed  
192 consent regarding the autopsy data analysis (authorization no.4153).

193

## 194 **Results**

### 195 **Relationship between cortisol levels and sex, age, survival period, and** 196 **postmortem period**

197           Serum cortisol levels were not associated with postmortem period, survival  
198 period, sex and related differences, or age.

199

### 200 **Relationship between cortisol levels and collection site**

201           Cortisol levels exhibited correlation ( $R=0.63-0.92$ ) with blood collection site,  
202 namely, left and right cardiac chambers and external iliac vein.

203

### 204 **Relationship between cortisol levels and cause of death**

205           At all blood collection sites, cortisol levels were approximately three times  
206 higher in hypothermia cases than in cases involving other causes of death ( $p<0.05-$   
207  $p<0.0001$ ; Fig 1a-c). Specifically, serum cortisol levels were significantly higher in

208 hypothermia cases compared with other causes of death: left cardiac blood, 20-120 µg/dL  
209 (median 50 µg/dL); right cardiac blood, 20-100 µg/dL (median 50 µg/dL); iliac vein, 20-  
210 130 µg/dL (median 60 µg/dL) versus left cardiac blood, 0-50 µg/dL (median 20 µg/dL);  
211 right cardiac blood, 0-40 µg/dL (median 10 µg/dL); iliac vein, 0-20 µg/dL (median 20  
212 µg/dL). Furthermore, most cases exhibited lower cortisol levels, except in hyperthermia  
213 cases (heat stroke: left cardiac blood, 0-60 µg/dL [median 30 µg/dL]; right cardiac blood,  
214 0-42 µg/dL [median 20 µg/dL]; iliac vein, 0-60 µg/dL [median 20 µg/dL]). There was no  
215 correlation between ACTH concentration and cortisol in hypothermia cases at any of the  
216 collection sites tested (left cardiac blood:  $Y = 0.0103x + 3.237$ ;  $r=0.065$ ;  $p > 0.05$  versus  
217 right cardiac blood:  $Y = 0.0217x + 2.7124$ ;  $r=0.113$ ;  $p > 0.05$  versus iliac vein:  $Y =$   
218  $0.026x + 2.4458$ ;  $r=0.170$ ;  $p > 0.05$ ).

219 Sensitivity and specificity cut-off values for distinguishing between groups with  
220 higher (hypothermia) and lower (other cause of deaths) cortisol levels were determined  
221 using ROC curve analysis and estimated as 30 µg/mL (0.917 and 0.852) for the left  
222 cardiac chamber, 25 µg/mL (0.917 and 0.836) for the right cardiac chamber, and 30  
223 µg/mL (0.917 and 0.872) for the common iliac veins.

224 **Fig 1. Cortisol levels in blood collected from three sites.** Cortisol levels by cause of  
225 death in the left (a) and right (b) cardiac chambers and the common iliac vein (c).



226

## 227 **Cortisol immunopositivity in the adrenal gland**

228 Cortisol immunostaining analysis indicated that in hypothermia cases, cortisol  
229 was primarily localized in the nucleus, whereas cortisol staining was predominant in the  
230 cytoplasm in cases involving other causes of death (Fig 2 a-c). the Graph in Fig 3a shows  
231 the cortisol positivity rate in the nucleus by cause of death. Hypothermia (0-70%, median  
232 50%) cases exhibited significantly higher cortisol positivity rate than the other groups (0-  
233 30%, median 5%). The graph in Fig 3b shows the number of cells that were positive for  
234 cortisol in the cytoplasm; however, it was not significantly different compared with the  
235 nucleus.

236 **Fig 2. Immunostaining of cortisol in the adrenal gland.** Micrographs showing  
237 hematoxylin-eosin staining (i) and immunostaining (ii) of cortisol in the adrenal gland in  
238 cases of (a) hypothermia, (b) intoxication, and (c) acute cardiac death (original  
239 magnification  $\times 100$ ).

240 **Fig 3. Cortisol positivity rate in the nucleus and cytoplasm by cause of death.**

241 Cortisol immunopositivity in the nucleus (a: hypothermia;  $p < 0.05$ ), cytoplasm (b:  
242 hypothermia;  $p > 0.05$ ), and nucleus to cytoplasm (c: hypothermia;  $p > 0.05$ ) ratio by  
243 cause of death.

244

## 245 **Mono-culture model**

246 In the mono-culture models, ACTH- and corticosterone-secreting cells were  
247 cultured separately at 4°C to ensure the absence of ACTH in the culture of corticosterone-  
248 secreting Y-1 cells (Fig 4a). AtT20 cells secreted ACTH after 10~15 min of cold exposure  
249 (10 min: median 120 pg/mL; 15 minutes: median 100 pg/mL), which subsequently  
250 decreased by 30 min (median 15 pg/mL) (Fig 5a). Corticosterone secretion by Y-1 cells  
251 increased slowly during the first 30 min of cold exposure (median 30 ng/mL) and  
252 subsequently decreased by 60-180 min (60 min: median 25 ng/mL; 180 min: median 20  
253 ng/mL) (Fig 5b). However, cell culture studies did not reveal a correlation between ACTH  
254 and corticosterone secretion in mono-culture experiments, and these results thus suggest  
255 that corticosterone secretion after cold exposure is independent of ACTH (Fig 5c).

256 **Fig 4. Mono- and co-culture of ACTH- (AtT20) and corticosterone-secreting (Y-1)**  
257 **cells.** Schematic illustration of mono-culture (a) and co-culture (b) models of pituitary  
258 and adrenal gland cells.

259 **Fig 5. Patterns of ACTH (AtT20) and corticosterone (Y-1) secretion over time.**  
260 ACTH (a) and corticosterone (b) concentrations over time under cold conditions (4°C) in  
261 mono-culture.

## 262 **Pituitary–adrenal cell co-culture model**

263 In the co-culture model (Fig 4b), ACTH secretion peaked at 10~15 min (10 min:  
264 median 130 pg/mL; 15 min: median 120 pg/mL) and slowly decreased from 20 min  
265 onwards (median 20 pg/mL). Corticosterone levels slowly increased beginning at 10 min  
266 (median 30 ng/mL), peaked at 20 min (median 300 ng/mL), and decreased after 30 min

267 (median 150 ng/mL) (Fig 6). These co-culture results suggest that corticosterone secretion  
268 is ACTH independent, as seen in mono-culture experiments (Fig 7).

269 **Fig 6. Secretion of ACTH and corticosterone over time in co-culture of AtT20 and**  
270 **Y-1 cells.** Concentrations of ACTH and corticosterone over time in co-culture of ACTH-  
271 (AtT20) and corticosterone-secreting (Y-1) cells under cold conditions (4°C).

272 **Fig 7. Correlation of ACTH and Corticosterone in mono-culture and co-culture**

273 The correlation between ACTH and corticosterone levels in mono-culture. The mono-  
274 culture study demonstrated that corticosterone secretion following cold exposure is  
275 independent of ACTH ( $Y = 1.28x + 11.34$ ,  $r = 0.3$ ,  $p > 0.05$ ). In co-culture the correlation  
276 between ACTH and corticosterone levels results demonstrated that corticosterone  
277 secretion following cold exposure is independent of ACTH ( $Y = 0.03x + 52.04$ ,  $r = 0.07$ ,  
278  $p > 0.05$ ).

279

## 280 **Discussion**

281 The correlation between cortisol levels and blood collection site in the present  
282 study suggests there were differences in cortisol levels at the various collection sites tested.  
283 Therefore, we assessed the relationship between cortisol levels in blood collected from  
284 each site and cause of death and found that cortisol levels in cases of hypothermia were  
285 three times higher than those in other causes of death. No significant correlations were  
286 observed between cortisol levels and causes of death other than hypothermia. There was  
287 no correlation between ACTH concentration and cortisol levels in hypothermia,  
288 suggesting that cortisol can be produced by the adrenal gland during cold stress without  
289 stimulation by ACTH. Such ACTH-independent production of cortisol might be

290 protective during prolonged (but not acute) periods of cold stress, as cold exposure  
291 promotes glucose production [55]. Importantly, micromorphologic changes in hormone  
292 expression in the adrenal cortex appear to be important for cold-induced cortisol secretion.

293 Cortisol is produced primarily in the zona fasciculata of the adrenal gland. Cell  
294 counts and nuclear and cytoplasm staining by technicians blinded to cause of death  
295 showed that during hypothermia, cortisol staining was primarily localized in the nucleus  
296 rather than the cytoplasm. Furthermore, nuclear staining of cortisol was significantly  
297 greater in cases of hypothermia than cases involving other causes of death, whereas no  
298 significant difference between groups was noted in terms of cytoplasmic staining. These  
299 findings support studies showing that glucocorticoid receptors are inactive in the  
300 cytoplasm, as they are complexed with other proteins [56]. When glucocorticoids bind,  
301 they become active dimers, move into the nucleus, and promote transcription. Here, we  
302 found high levels of cortisol staining in the nucleus during cold exposure. Considered  
303 together, these observations suggest that cortisol is secreted in large quantities in response  
304 to the stress of cold exposure and that re-uptake might also occur [57-59].

305 In this study, we used a novel co-culture system to assess ACTH and  
306 corticosterone secretion secondary to cold stimulation. We demonstrated that ACTH and  
307 corticosterone secretion levels and patterns differed and were not correlated. Mono-  
308 culture of ACTH- and corticosterone-secreting cells under ACTH-free conditions at 4°C  
309 resulted in a sudden peak in ACTH at 10 min that decreased after 30 min. This can be  
310 explained by the half-life of mouse ACTH [60]. However, in an ACTH-free environment,  
311 the increase in corticosterone was lower than that seen under co-culture conditions, and  
312 there was no correlation between corticosterone and ACTH levels. These results suggest  
313 that cold exposure leads to independent increased secretion of cortisol.

314           There are some limitations to this study. The correlation between ACTH and  
315 corticosterone levels in mouse cell culture may differ from that observed in human  
316 autopsy examples. The half-life of hormones may also differ in the cell culture models  
317 and in humans. Furthermore, it is necessary to examine differences between human  
318 cortisol and mouse corticosterone and address problems associated with temperature  
319 settings in the cell culture model [61].

320

321           In conclusion, the present study showed that serum cortisol level can be used as  
322 a biomarker for cold exposure and that cortisol production in response to cold stress does  
323 not depend on ACTH-based activation. As immunostaining for cortisol revealed high  
324 expression levels in the nucleus after cold exposure, it is possible that cortisol production  
325 following cold exposure is independent of ACTH stimulation.

326

## 327 **References**

328

329 1. MANT AK. SOME POST-MORTEM OBSERVATIONS IN ACCIDENTAL  
330 HYPOTHERMIA. *Med Sci Law*. 1964;4:44-6.

331 2. Hirvonen J. Necropsy findings in fatal hypothermia cases. *Forensic Sci*.  
332 1976;8(2):155-64.

333 3. Krjukoff A. Beitrag zur Frage des Todes durch Erfrieren. *Vjschr Gerichtl Med*.  
334 1914;47:79-101

335 4. Mizukami H, Shimizu K, Shiono H, Uezono T, Sasaki M. Forensic diagnosis of death  
336 from cold. *Leg Med (Tokyo)*. 1999;1(4):204-9.

337 5. Dirrhofer VR, Sigrist TH. Muskelblutungen im Koerperkern-ein Zeichen vitaler  
338 Reaktion beim Tod durch Unterkuehlung? *Beitr Gerichte Med*. 1978;37:159-66

339 6. Schneider V, Klung E. Tod durch Unterkuehlung-Gibt es neue Gesichtspunkte zur  
340 Diagnostik? *Z Rechtsmed*. 1980;86:59-69.

341 7. Ishikawa T, Miyaishi S, Tachibana T, Ishizu H, Zhu BL, Maeda H. Fatal  
342 hypothermia related vacuolation of hormone-producing cells in the anterior  
343 pituitary. *Leg Med (Tokyo)*. 2004;6(3):157-63.

344 8. Tani N, Michiue T, Chen JH, Oritani S, Ishikawa T. Usefulness of postmortem  
345 biochemistry in identification of ketosis: Diagnosis of ketoacidosis at the onset of  
346 autoimmune type 1 diabetes in an autopsy case with cold exposure and malnutrition.  
347 *Leg Med (Tokyo)*. 2016;22:23-9.

348 9. Byard RW, Langlois NEI. Wandering Dementia-A Syndrome with Forensic  
349 Implications. *J Forensic Sci*. 2019;64(2):443-5.

- 350 10. Rousseau G, Reynier P, Jousset N, Rougé-Maillart C, Palmiere C. Updated review of  
351 postmortem biochemical exploration of hypothermia with a presentation of standard  
352 strategy of sampling and analyses. *Clin Chem Lab Med*. 2018;56(11):1819-27.
- 353 11. Tani N, Michiue T, Chen JH, Oritani S, Ishikawa T. Usefulness of postmortem  
354 biochemistry in identification of ketosis: Diagnosis of ketoacidosis at the onset of  
355 autoimmune type 1 diabetes in an autopsy case with cold exposure and malnutrition.  
356 *Leg Med (Tokyo)*. 2016;22:23-9.
- 357 12. Palmiere C, Tettamanti C, Augsburger M, Burkhardt S, Sabatasso S, Lardi C, et al.  
358 Postmortem biochemistry in suspected starvation-induced ketoacidosis. *J Forensic*  
359 *Leg Med*. 2016;42:51-5.
- 360 13. Palmiere C, Teresiński G, Hejna P. Postmortem diagnosis of hypothermia. *Int J Legal*  
361 *Med*. 2014;128(4):607-14.
- 362 14. Yoshida C, Ishikawa T, Michiue T, Quan L, Maeda H. Postmortem biochemistry and  
363 immunohistochemistry of chromogranin A as a stress marker with special regard to  
364 fatal hypothermia and hyperthermia. *Int J Legal Med*. 2011;125(1):11-20.
- 365 15. Chen JH, Michiue T, Ishikawa T, Maeda H. Molecular pathology of natriuretic  
366 peptides in the myocardium with special regard to fatal intoxication, hypothermia,  
367 and hyperthermia. *Int J Legal Med*. 2012;126(5):747-56.
- 368 16. Ishikawa T, Michiue T, Maeda H. Evaluation of postmortem serum and cerebrospinal  
369 fluid growth hormone levels in relation to the cause of death in forensic autopsy. *Hum*  
370 *Cell*. 2011;24(2):74-7.
- 371 17. Ishikawa T, Quan L, Li DR, Zhao D, Michiue T, Hamel M, et al. Postmortem  
372 biochemistry and immunohistochemistry of adrenocorticotrophic hormone with  
373 special regard to fatal hypothermia. *Forensic Sci Int*. 2008;179(2-3):147-51.

- 374 18. Ishikawa T, Michiue T, Zhao D, Komatsu A, Azuma Y, Quan L, et al. Evaluation of  
375 postmortem serum and cerebrospinal fluid levels of thyroid-stimulating hormone with  
376 special regard to fatal hypothermia. *Leg Med (Tokyo)*. 2009;11 Suppl 1:S228-30.
- 377 19. Hervet T, Teresiński G, Hejna P, Descloux E, Grouzmann E, Palmiere C.  
378 Catecholamines and their O-methylated metabolites in vitreous humor in hypothermia  
379 cases. *Forensic Sci Med Pathol*. 2016;12(2):163-9.
- 380 20. Ishikawa T, Inamori-Kawamoto O, Quan L, Michiue T, Chen JH, Wang Q, et al.  
381 Postmortem urinary catecholamine levels with regard to the cause of death. *Leg Med*  
382 (Tokyo). 2014;16(6):344-9
- 383 21. Ishikawa T, Quan L, Michiue T, Kawamoto O, Wang Q, Chen JH, et al. Postmortem  
384 catecholamine levels in pericardial and cerebrospinal fluids with regard to the cause  
385 of death in medicolegal autopsy. *Forensic Sci Int*. 2013;228(1-3):52-60.
- 386 22. Miller WL. The Hypothalamic-Pituitary-Adrenal Axis: A Brief History. *Horm Res*  
387 *Paediatr*. 2018;89(4):212-23.
- 388 23. Peeters B, Boonen E, Langouche L, Van den Berghe G. The HPA axis response to  
389 critical illness: New study results with diagnostic and therapeutic implications. *Mol*  
390 *Cell Endocrinol*. 2015;408:235-40.
- 391 24. Inada M, Iwasaki K, Imai C, Hashimoto S. Spironolactone effective hypertension in  
392 the elderly due to 11beta-hydroxysteroid dehydrogenase type 2 (11beta-HSD2)  
393 impairment: contributory role of determining serum cortisol/cortisone ratio as a  
394 marker of 11beta-HSD2 activity. *Intern Med*. 2008;47(24):2157-64.
- 395 25. Yanase T, Imai T, Simpson ER, Waterman MR. Molecular basis of 17 $\alpha$ -  
396 hydroxylase/17,20-lyase deficiency. *J Steroid Biochem Mol Biol*. 1992;43(8):973-9.
- 397 26. Levran D, Ben-Shlomo I, Pariente C, Dor J, Mashiach S, Weissman A. Familial



- 398 partial 17,20-desmolase and 17 $\alpha$ -hydroxylase deficiency presenting as  
399 infertility. *J Assist Reprod Genet.* 2003;20(1):21-8.
- 400 27. Higgs P, Costa M, Freke A, Papasouliotis K. Measurement of thyroxine and cortisol  
401 in canine and feline blood samples using two immunoassay analysers. *J Small Anim  
402 Pract.* 2014;55(3):153-9.
- 403 28. Irvine KL, Burt K, Hill AJ, Shaw S, Papasouliotis K. Initial analytic quality  
404 assessment and method comparison of an immunoassay for adrenocorticotrophic  
405 hormone measurement in equine samples. *Vet Clin Pathol.* 2016;45(1):154-63.
- 406 29. Yajima D, Asari M, Okuda K, Maseda C, Yamada H, Ichimaru C, et al. An objective  
407 approach using three indexes for determining fatal hypothermia due to cold exposure;  
408 statistical analysis of oxyhemoglobin saturation data. *Leg Med (Tokyo).*  
409 2015;17(6):451-8.
- 410 30. Kanto-Nishimaki Y, Saito H, Watanabe-Aoyagi M, Toda R, Iwadate K.  
411 Investigation of oxyhemoglobin and carboxyhemoglobin ratios in right and left  
412 cardiac blood for diagnosis of fatal hypothermia and death by fire. *Leg Med  
413 (Tokyo).* 2014;16(6):321-5.
- 414 31. Rege J, Nakamura Y, Wang T, Merchen TD, Sasano H, Rainey WE. Transcriptome  
415 profiling reveals differentially expressed transcripts between the human adrenal zona  
416 fasciculata and zona reticularis. *J Clin Endocrinol Metab.* 2014;99(3):E518-27.
- 417 32. Fallo F, Castellano I, Gomez-Sanchez CE, Rhayem Y, Pilon C, Vicennati V, et al.  
418 Histopathological and genetic characterization of aldosterone-producing adenomas  
419 with concurrent subclinical cortisol hypersecretion: a case series. *Endocrine.*  
420 2017;58(3):503-12.
- 421 33. Nakane T, Tsai J, Audhya T, Brown C, Kardos P, Hollander CS. Growth hormone-

- 422 releasing factor releases ACTH from an AtT-20 mouse pituitary tumor cell line but  
423 not from normal pituitary cells. *Life Sci.* 1987;40(22):2161-7.
- 424 34. Sato E, Maeda Y, Sato Y, Hinata A, Gomi H, Koga D, et al. Culture in 10% O.  
425 *Biochem J.* 2019;476(5):827-42.
- 426 35. Kameda H, Yamamoto M, Tone Y, Tone M, Melmed S. Proton Sensitivity of  
427 Corticotropin-Releasing Hormone Receptor 1 Signaling to Proopiomelanocortin in  
428 Male Mice. *Endocrinology.* 2019;160(2):276-91.
- 429 36. BUONASSISI V, SATO G, COHEN AI. Hormone-producing cultures of adrenal  
430 and pituitary tumor origin. *Proc Natl Acad Sci U S A.* 1962;48:1184-90.
- 431 37. FURTH J, GADSEN EL, UPTON AC. ACTH secreting transplantable pituitary  
432 tumors. *Proc Soc Exp Biol Med.* 1953;84(1):253-4.
- 433 38. Costa ET, Forti FL, Rocha KM, Moraes MS, Armelin HA. Molecular mechanisms  
434 of cell cycle control in the mouse Y1 adrenal cell line. *Endocr Res.* 2004;30(4):503-  
435 9.
- 436 39. Murofushi H, Kotani S, Aizawa H, Maekawa S, Sakai H. Comparison of a major  
437 heat-stable microtubule-associated protein in HeLa cells and 190-kDa microtubule-  
438 associated protein in bovine adrenal cortex. *J Biochem.* 1987;102(5):1101-12.
- 439 40. Yasumura Y, Buonassisi V, Sato G. Clonal analysis of differentiated function in  
440 animal cell cultures. I. Possible correlated maintenance of differentiated function  
441 and the diploid karyotype. *Cancer Res.* 1966;26(3):529-35.
- 442 41. COHEN AI, BLOCH E, CELOZZI E. In vitro response of functional experimental  
443 adrenal tumors to corticotropin ACTH. *Proc Soc Exp Biol Med.* 1957;95(2):304-9.
- 444 42. COHEN AI, FURTH J, BUFFETT RF. Histologic and physiologic characteristics of  
445 hormone-secreting transplantable adrenal tumors in mice and rats. *Am J Pathol.*

- 446 1957;33(4):631-51.
- 447 43. Porstmann T, Kiessig ST. Enzyme immunoassay techniques. An overview. J  
448 Immunol Methods. 1992;150(1-2):5-21.
- 449 44. Avrameas S. Amplification systems in immunoenzymatic techniques. J Immunol  
450 Methods. 1992;150(1-2):23-32.
- 451 45. Ohkawara T, Miyashita K, Nishihira J, Mitsuyama K, Takeda H, Kato M, et al.  
452 Transgenic over-expression of macrophage migration inhibitory factor renders mice  
453 markedly more susceptible to experimental colitis. Clin Exp Immunol.  
454 2005;140(2):241-8.
- 455 46. Sugiyama F, Wu J, Fujioka M, Ezaki J, Takeda K, Miyaura C, et al. Soybean  
456 isoflavones preserve bone mass in hindlimb-unloaded mice. J Bone Miner Metab.  
457 2006;24(6):439-46.
- 458 47. Nakano S, Inada Y, Masuzaki H, Tanaka T, Yasue S, Ishii T, et al. Bezafibrate  
459 regulates the expression and enzyme activity of 11beta-hydroxysteroid  
460 dehydrogenase type 1 in murine adipose tissue and 3T3-L1 adipocytes. Am J  
461 Physiol Endocrinol Metab. 2007;292(4):E1213-22.
- 462 48. Whyte DG, Johnson AK. Lesions of the anteroventral third ventricle region  
463 exaggerate neuroendocrine and thermogenic but not behavioral responses to a novel  
464 environment. Am J Physiol Regul Integr Comp Physiol. 2007;292(1):R137-42.
- 465 49. Häuser S, Wegele C, Stump-Guthier C, Borkowski J, Weiss C, Rohde M, et al.  
466 Capsule and fimbriae modulate the invasion of Haemophilus influenzae in a human  
467 blood-cerebrospinal fluid barrier model. Int J Med Microbiol. 2018;308(7):829-39.
- 468 50. Dinner S, Borkowski J, Stump-Guthier C, Ishikawa H, Tenenbaum T, Schrotten H,  
469 et al. A Choroid Plexus Epithelial Cell-based Model of the Human Blood-

- 470 Cerebrospinal Fluid Barrier to Study Bacterial Infection from the Basolateral Side. J  
471 Vis Exp. 2016(111).
- 472 51. Schwerk C, Papandreou T, Schuhmann D, Nickol L, Borkowski J, Steinmann U, et  
473 al. Polar invasion and translocation of *Neisseria meningitidis* and *Streptococcus suis*  
474 in a novel human model of the blood-cerebrospinal fluid barrier. PLoS One.  
475 2012;7(1):e30069.
- 476 52. Rose R, Häuser S, Stump-Guthier C, Weiss C, Rohde M, Kim KS, et al. Virulence  
477 factor-dependent basolateral invasion of choroid plexus epithelial cells by  
478 pathogenic *Escherichia coli* in vitro. FEMS Microbiol Lett. 2018;365(24).
- 479 53. Almamy A, Schwerk C, Schrotten H, Ishikawa H, Asif AR, Reuss B. Crossreactivity  
480 of an Antiserum Directed to the Gram-Negative Bacterium *Neisseria gonorrhoeae*  
481 with the SNARE-Complex Protein Snap23 Correlates to Impaired Exocytosis in  
482 SH-SY5Y Cells. J Mol Neurosci. 2017;62(2):163-80.
- 483 54. Tani N, Ikeda T, Watanabe M, Toyomura J, Ohyama A, Ishikawa T. Prolactin  
484 selectively transported to cerebrospinal fluid from blood under hypoxic/ischemic  
485 conditions. PLoS One. 2018;13(6):e0198673.
- 486 55. Carroll JA, Matteri RL, Dyer CJ, Beausang LA, Zannelli ME. Impact of  
487 environmental temperature on response of neonatal pigs to an endotoxin challenge.  
488 Am J Vet Res. 2001;62(4):561-6.
- 489 56. Haché RJ, Tse R, Reich T, Savory JG, Lefebvre YA. Nucleocytoplasmic trafficking  
490 of steroid-free glucocorticoid receptor. J Biol Chem. 1999;274(3):1432-9.
- 491 57. Sakly M, Koch B. Physicochemical analysis of glucocorticoid receptor in the  
492 immature pituitary gland: evidence for lability and aggregation of the heat-activated  
493 form. Mol Cell Endocrinol. 1982;28(1):27-35.
- 494 58. Thompson EB, Aviv D, Lippman ME. Variants of HTC cells with low tyrosine

- 495 aminotransferinase inducibility and apparently normal glucorticoid receptors.  
496 Endocrinology. 1977;100(2):406-19.
- 497 59. Nicholson ML, Young DA. Effect of glucocorticoid hormones in vitro on the  
498 structural integrity of nuclei in corticosteroid-sensitive and -resistant lines of  
499 lymphosarcoma P1798. Cancer Res. 1978;38(11 Pt 1):3673-80.
- 500 60. Mains RE, Eipper BA. Biosynthesis of adrenocorticotrop hormone in mouse  
501 pituitary tumor cells. J Biol Chem. 1976;251(13):4115-20.
- 502 61. Rousseau G, Reynier P, Jousset N, Rougé-Maillart C, Palmiere C. Updated review  
503 of postmortem biochemical exploration of hypothermia with a presentation of  
504 standard strategy of sampling and analyses. Clin Chem Lab Med.  
505 2018;56(11):1819-27.  
506

507

## 508 **Supporting information**

509 **Fig S1. Correlation with cortisol level.** Relationship between cortisol level in blood  
510 collected at different sites and sex (a), age (b), survival period (c), and postmortem period  
511 (d).

512

513 **Fig S2. Relationship between cortisol level and blood collection site.** Left and right  
514 cardiac blood (a), left cardiac blood-iliac vein blood (b), and right cardiac blood-iliac vein  
515 blood (c).

516

Figure 1.

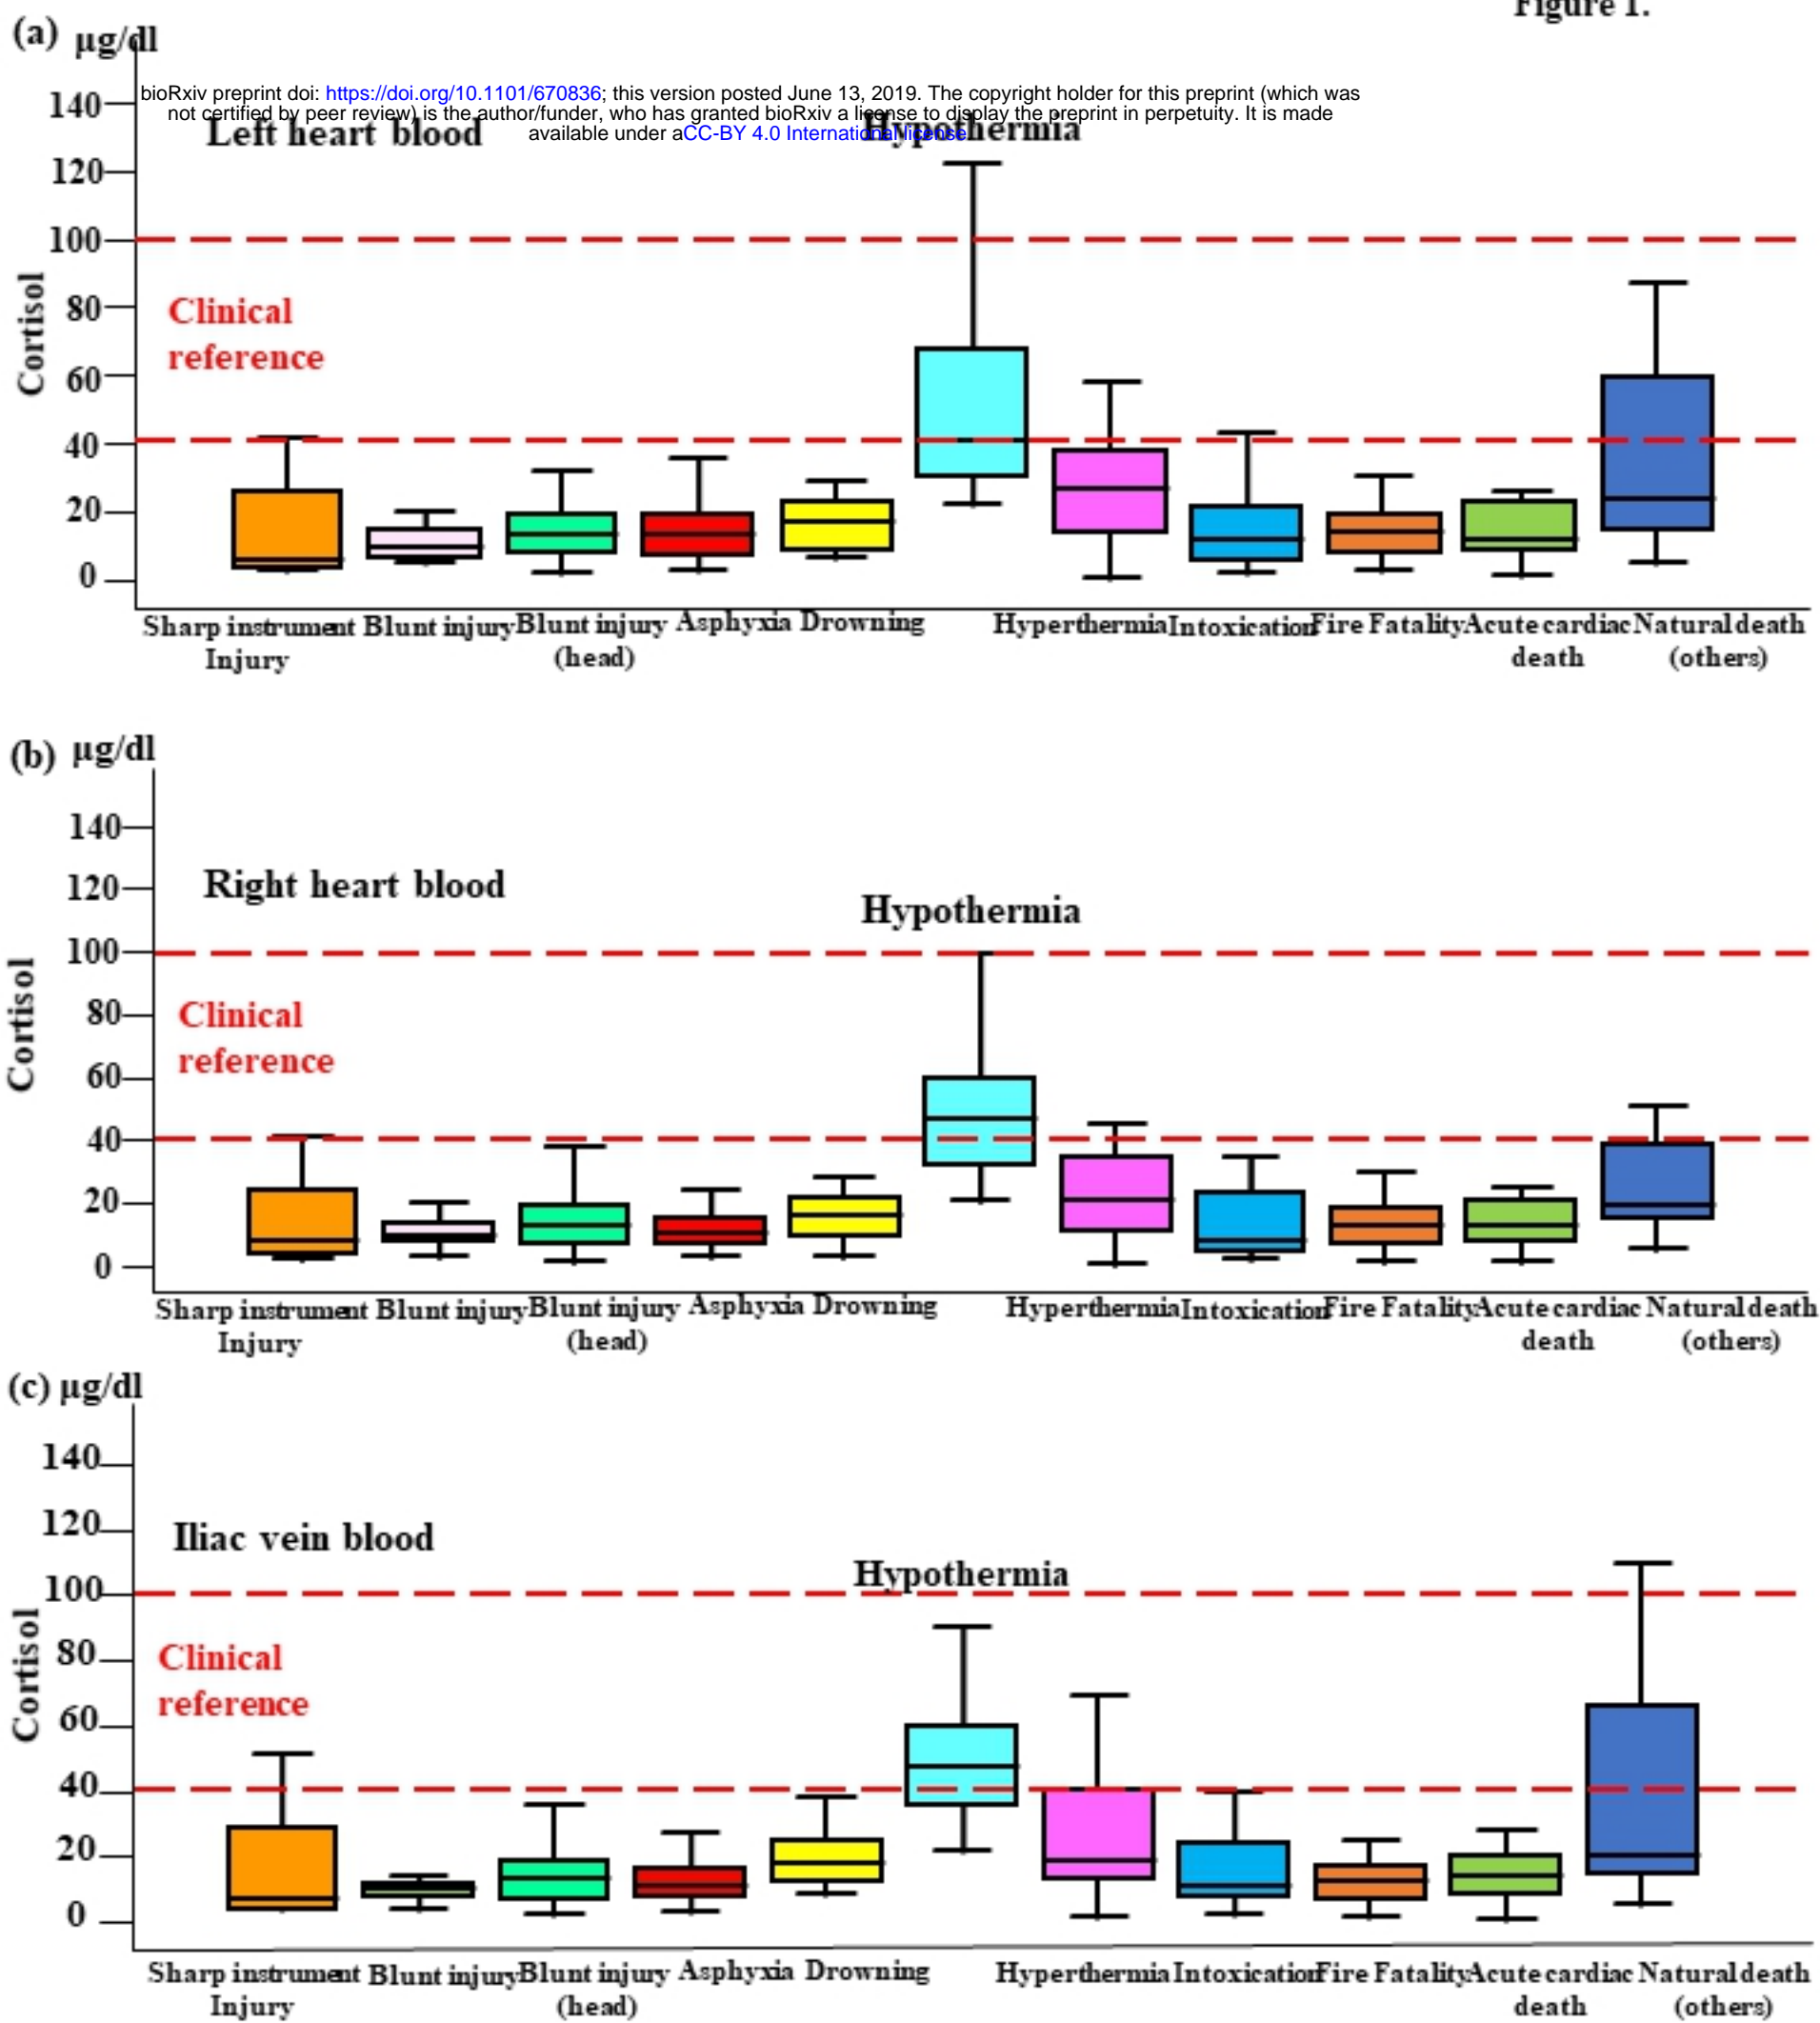

Figure\_1.



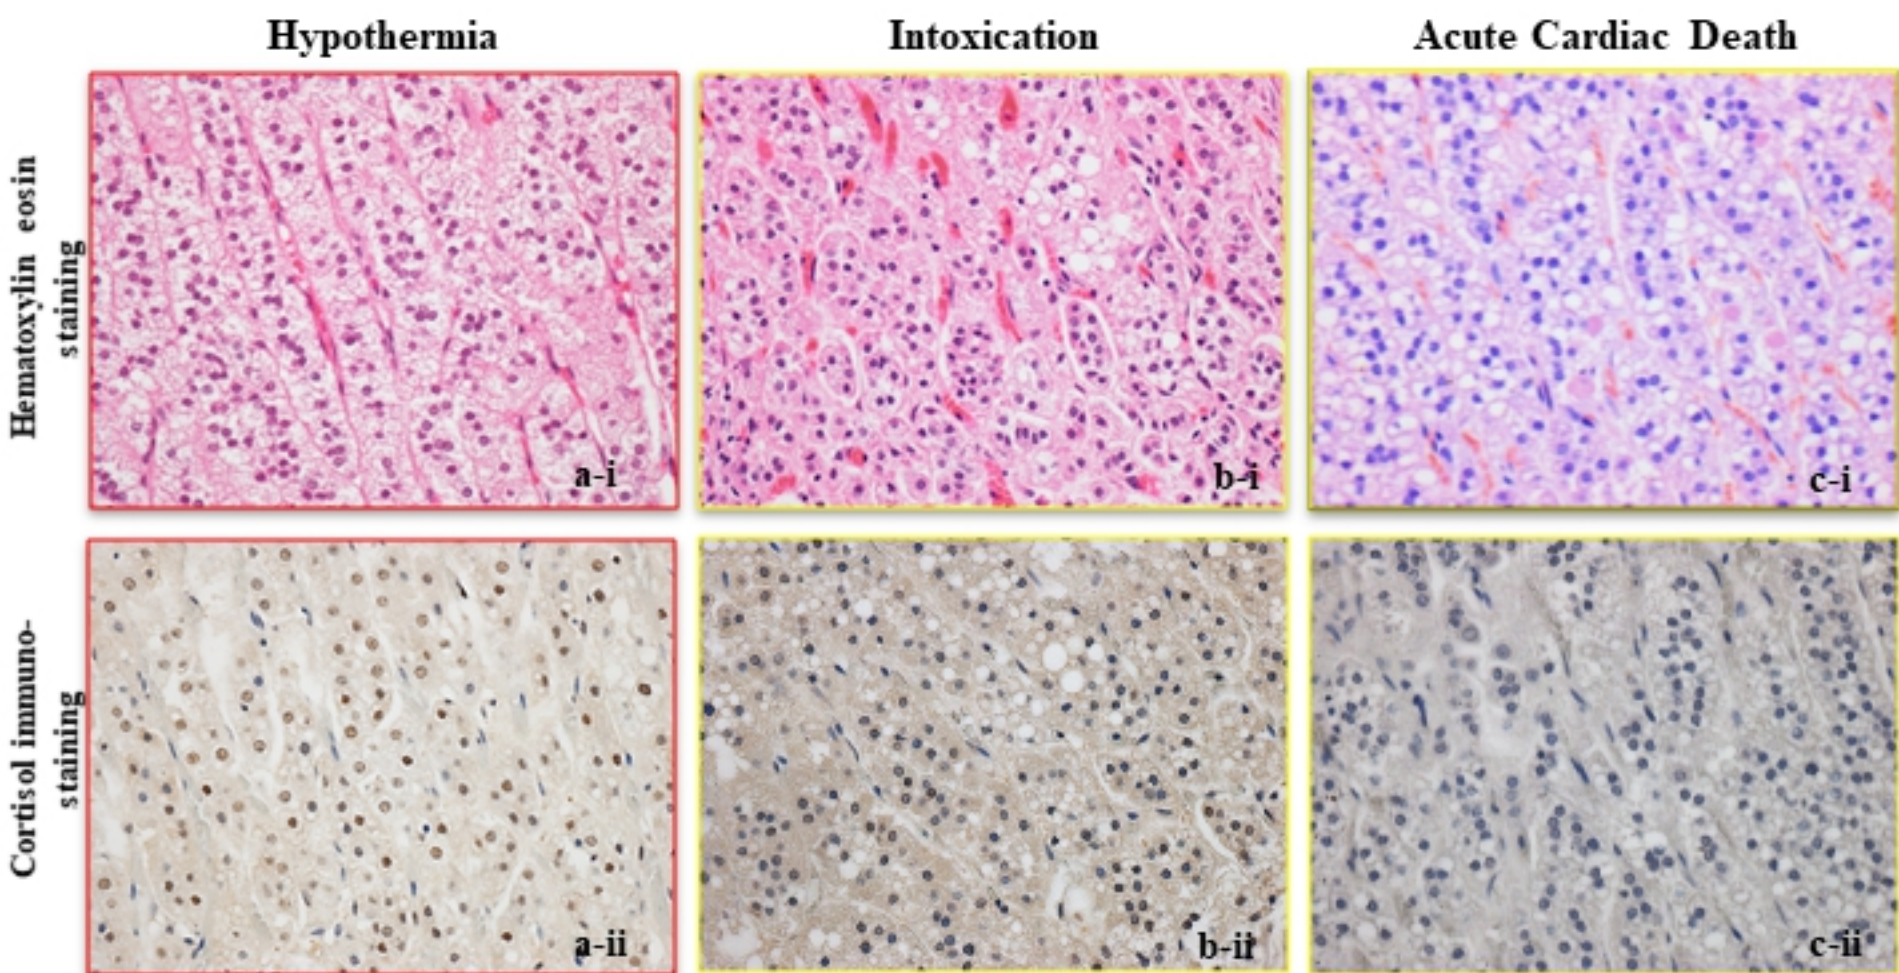

**Figure 2.**



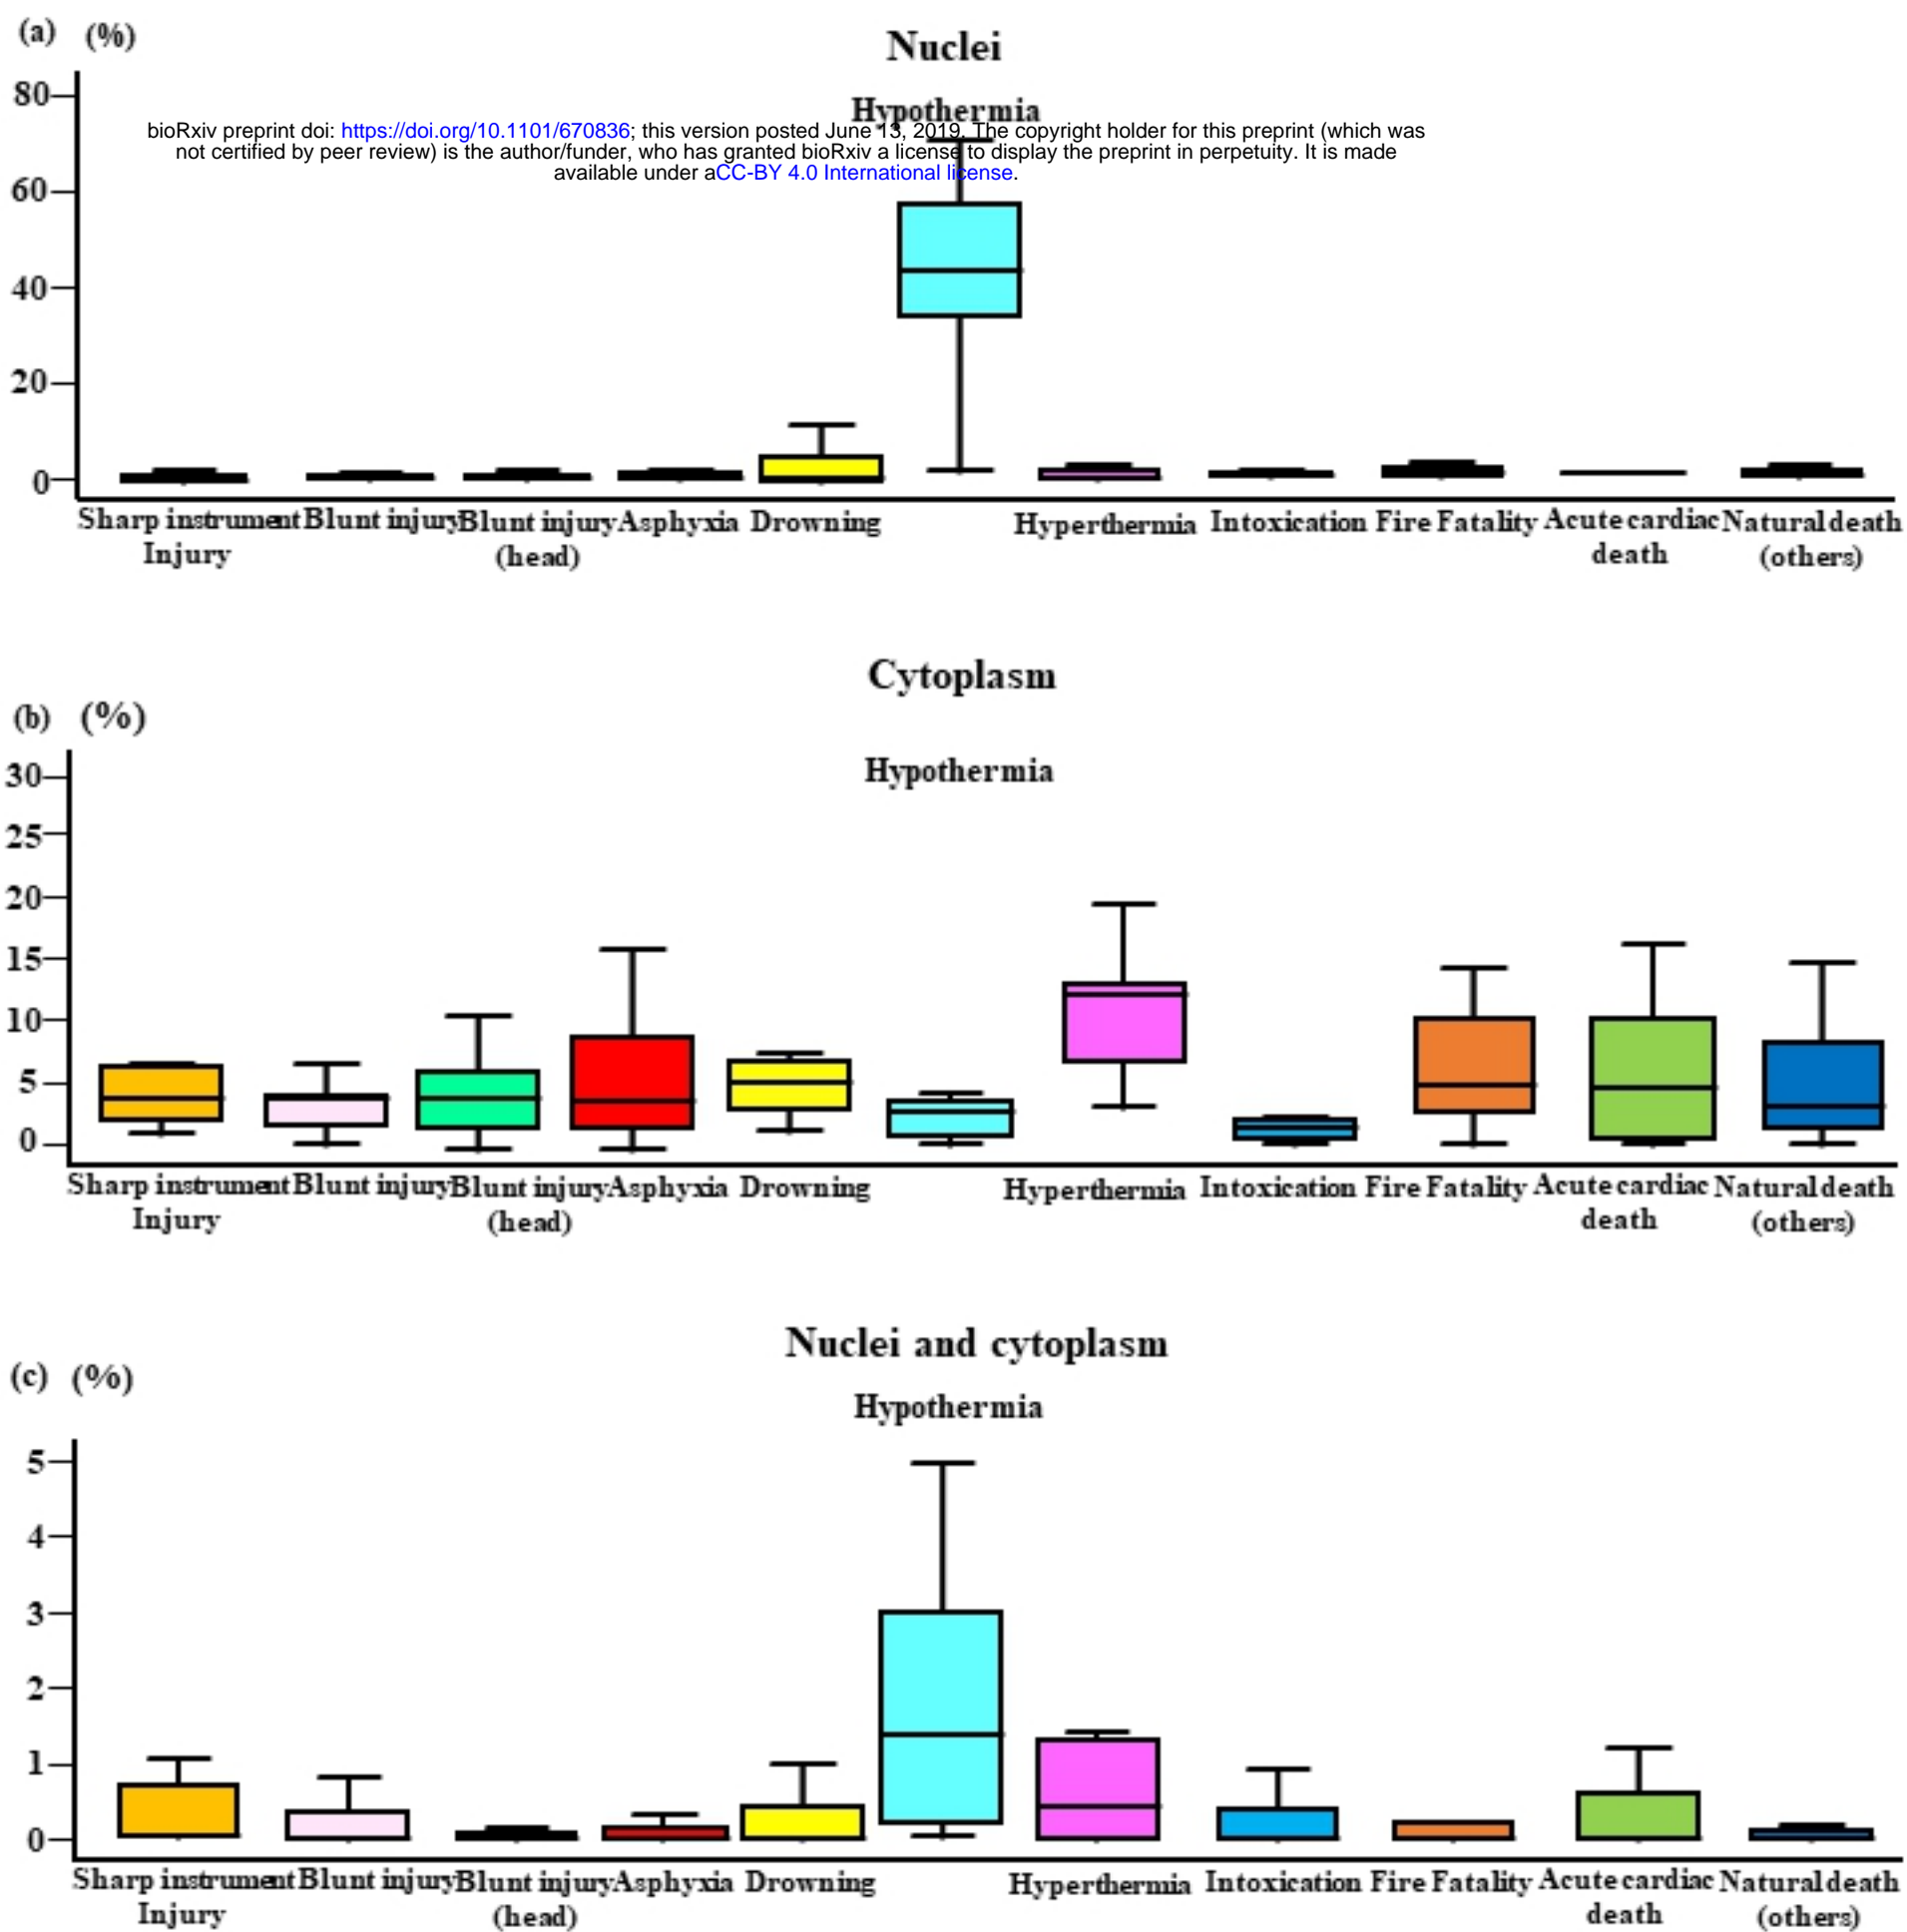

Figure. 3

Figure. 4a

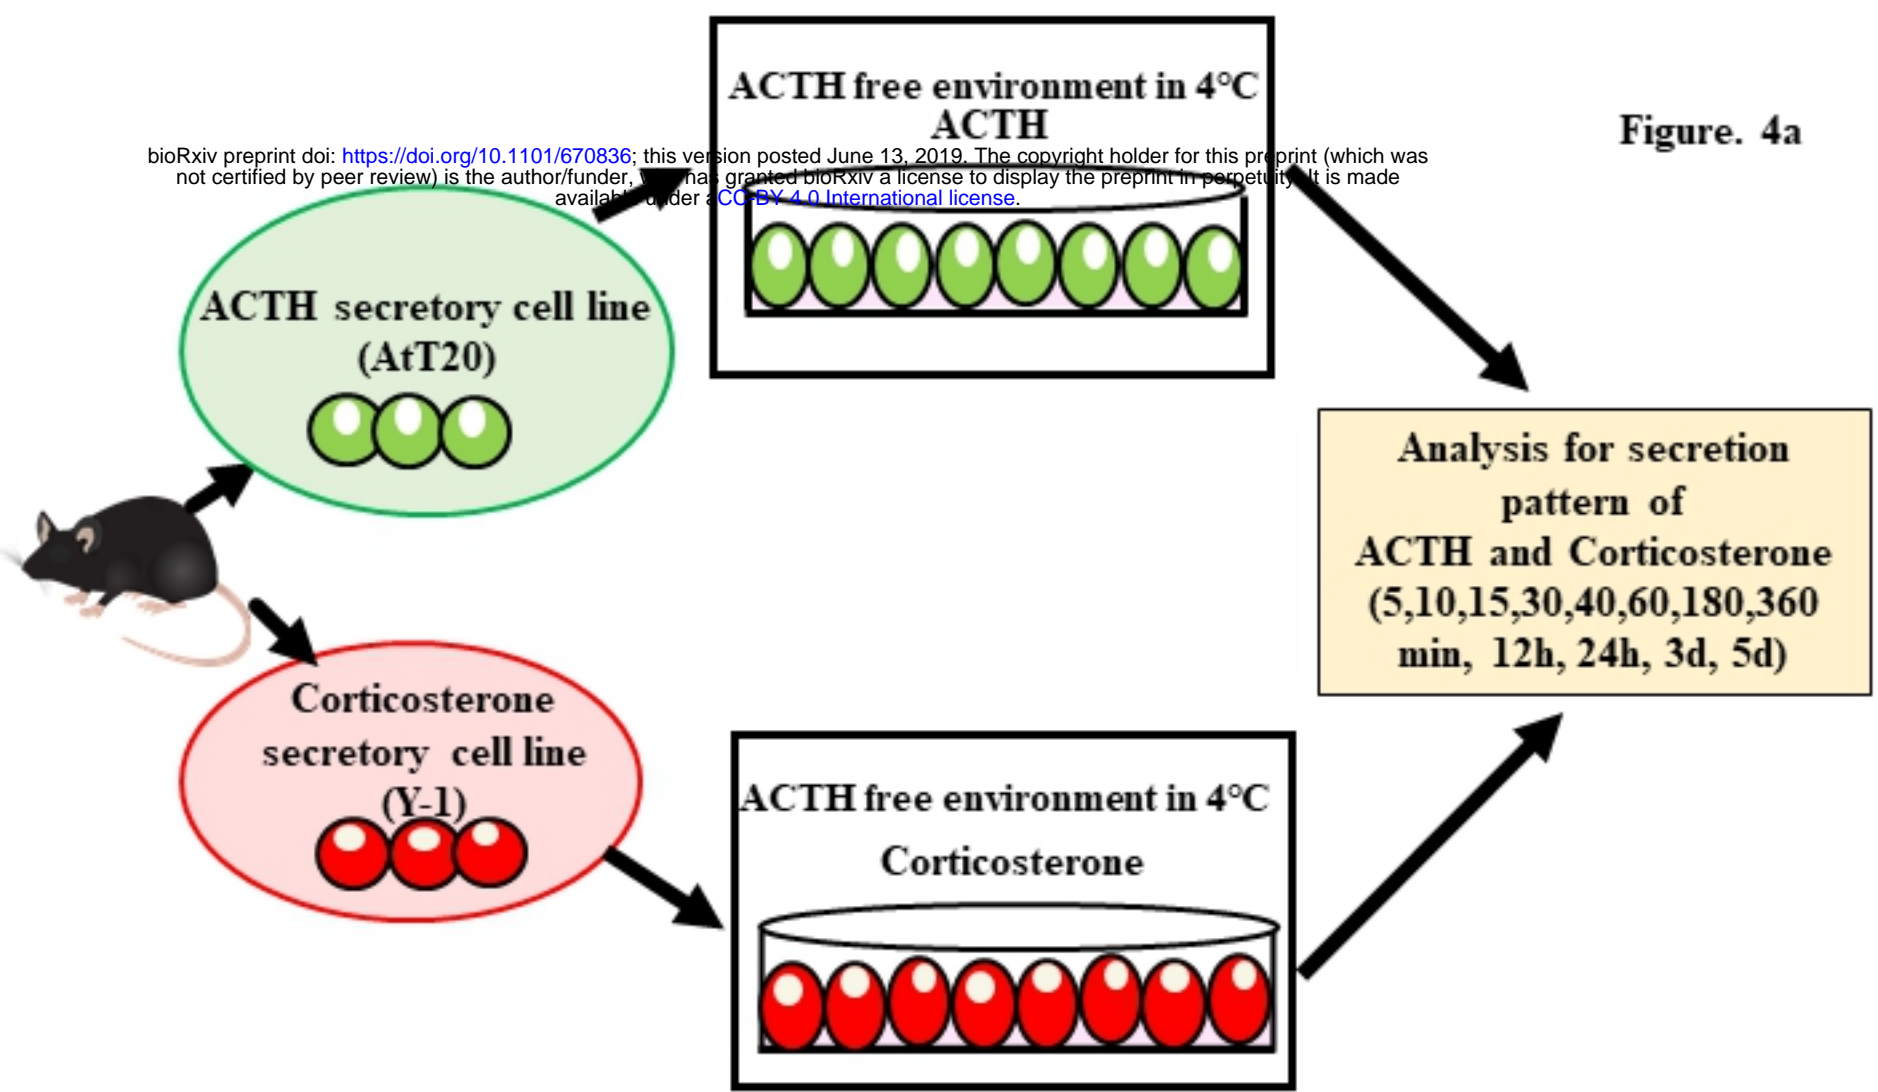

Figure. 4b

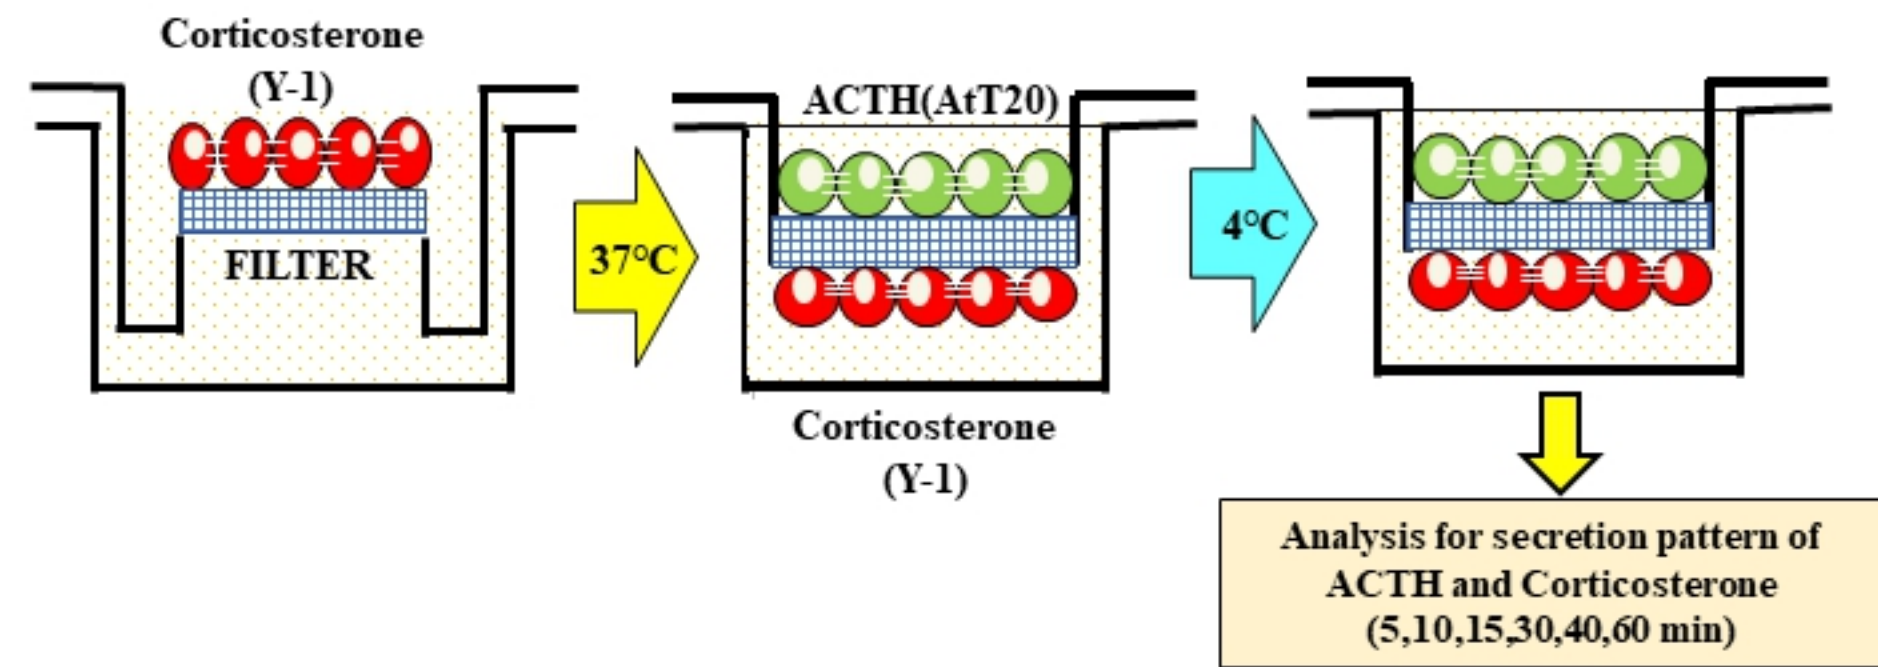

Figure\_4.

Figure. 5a

(pg/ml)

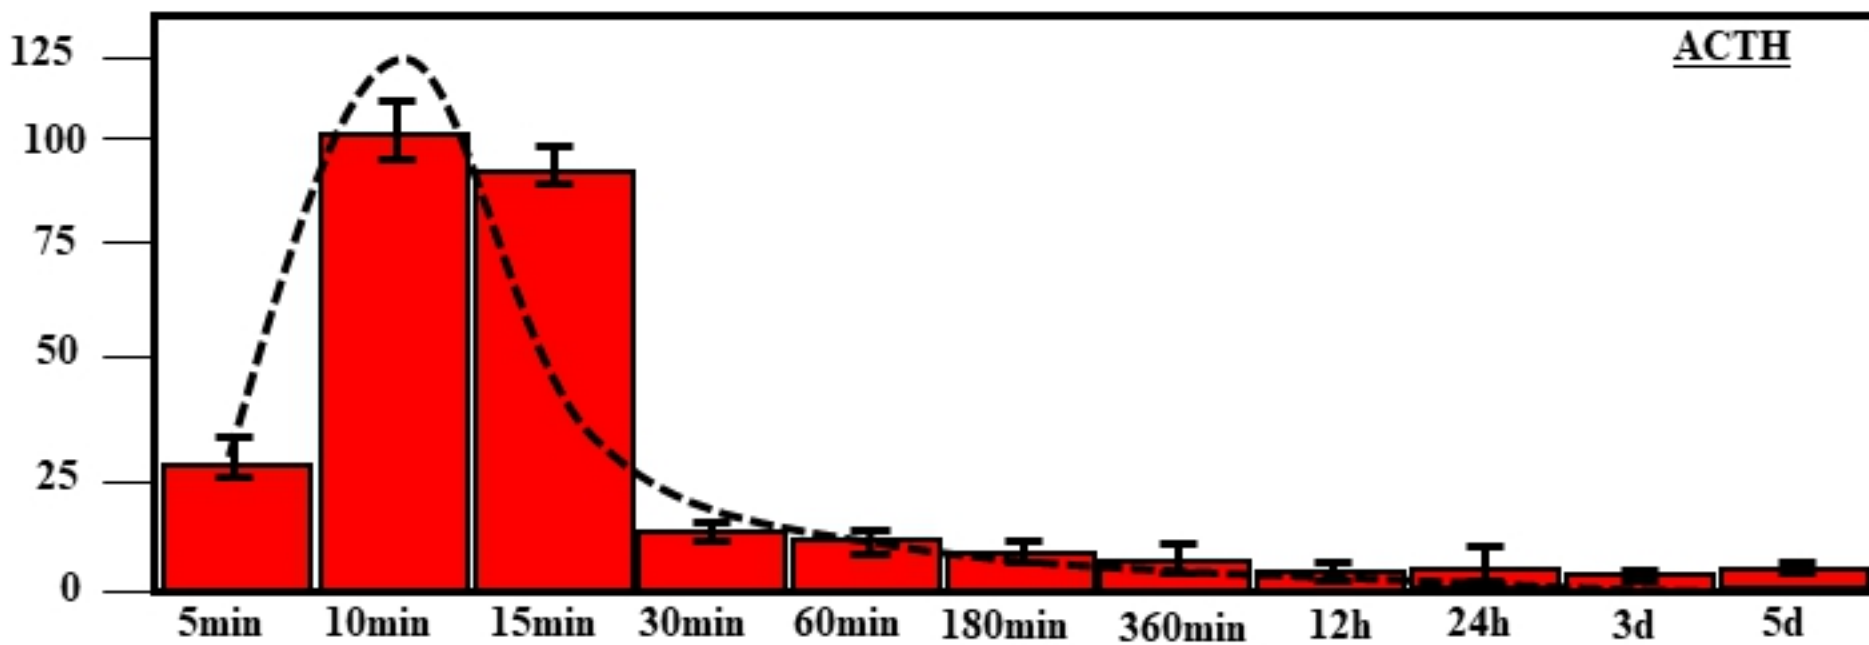

(ng/ml)

Figure. 5b

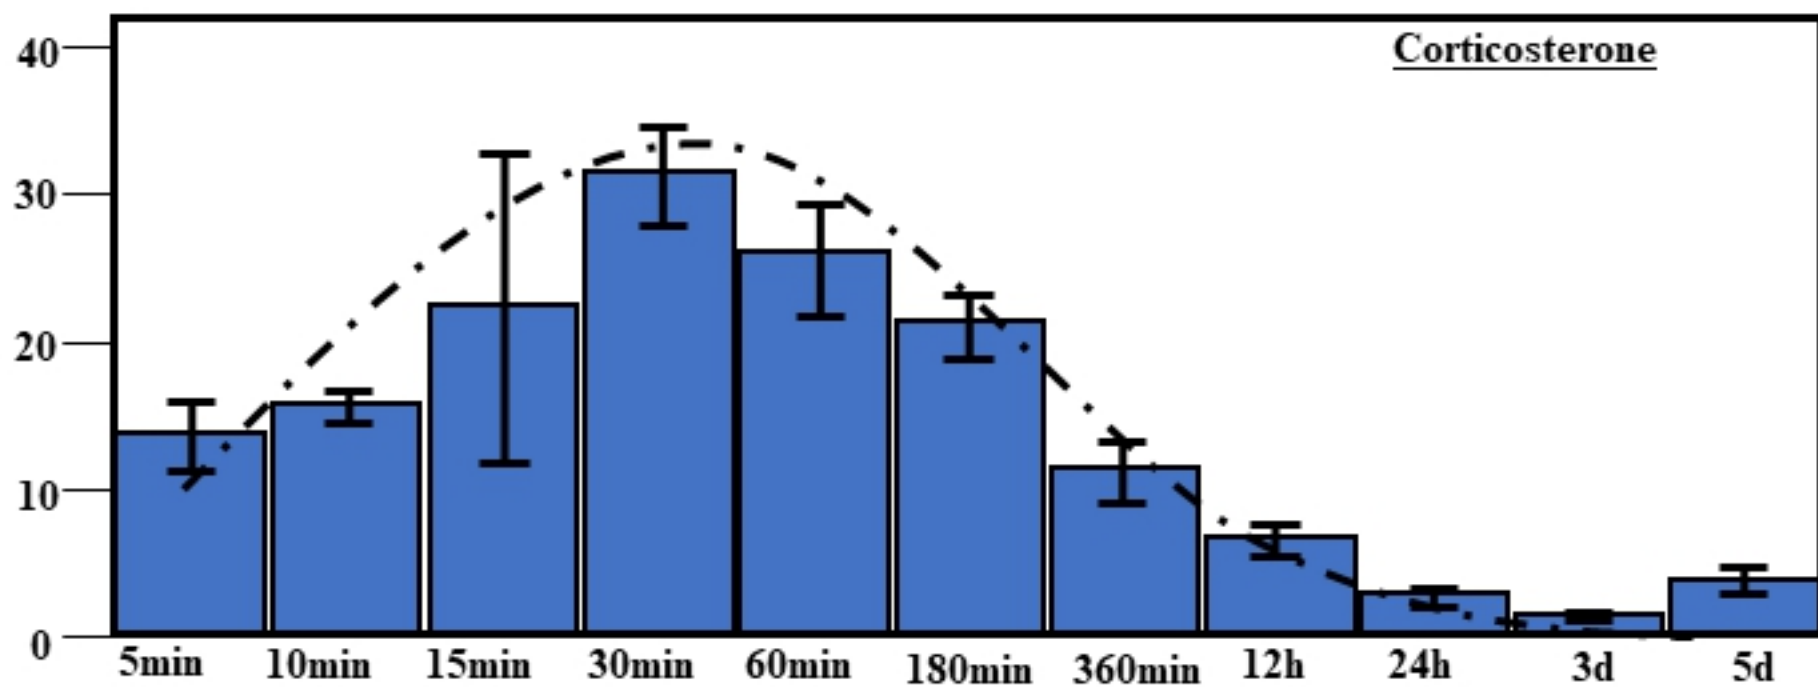

Figure. 6

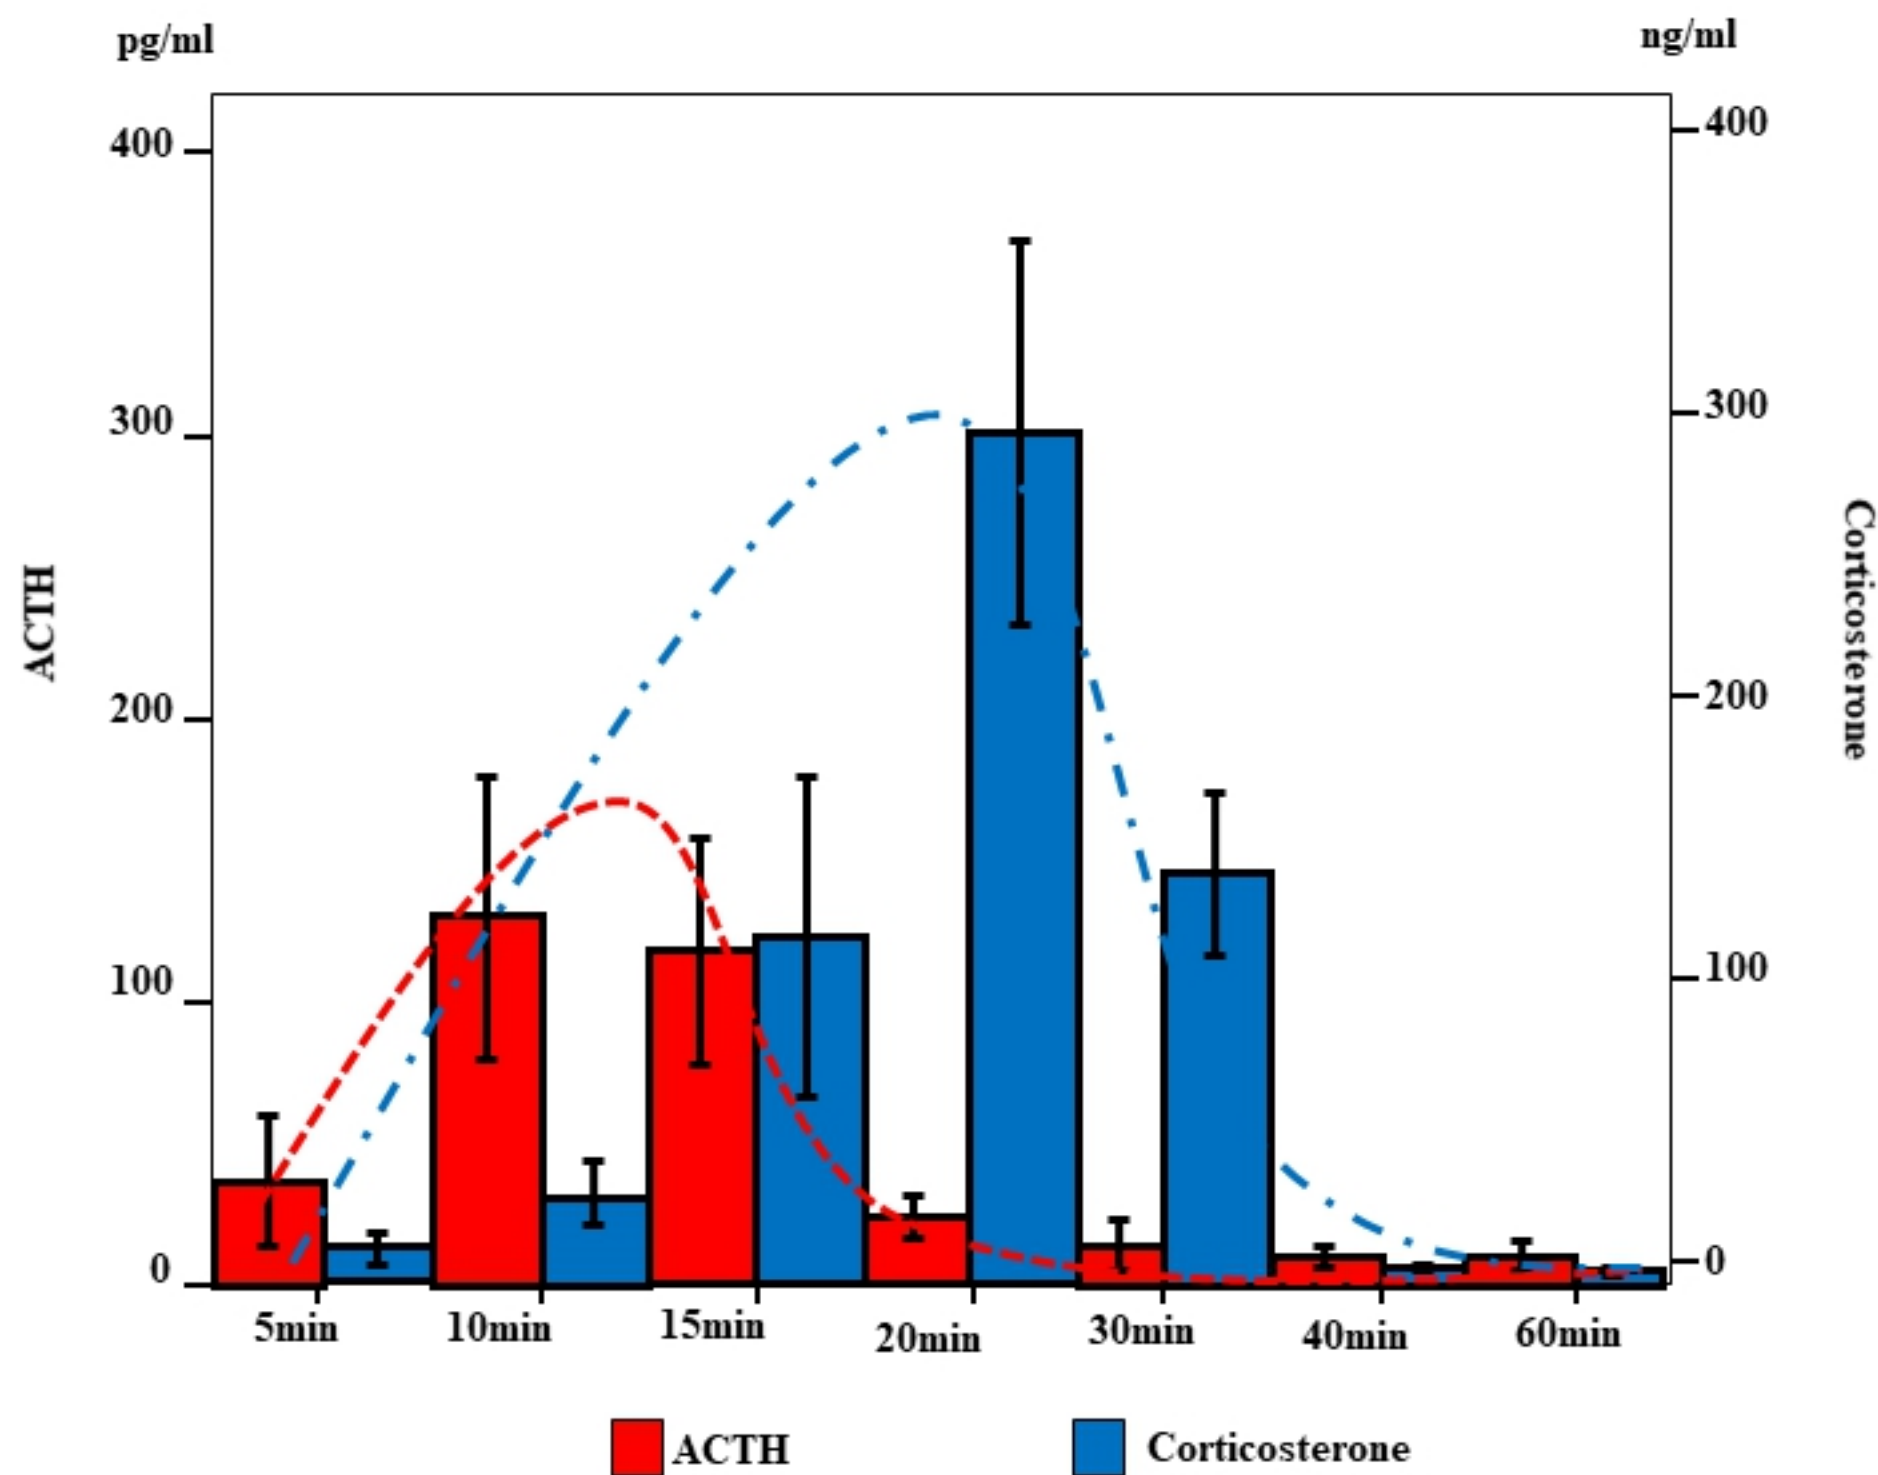

Figure\_6.

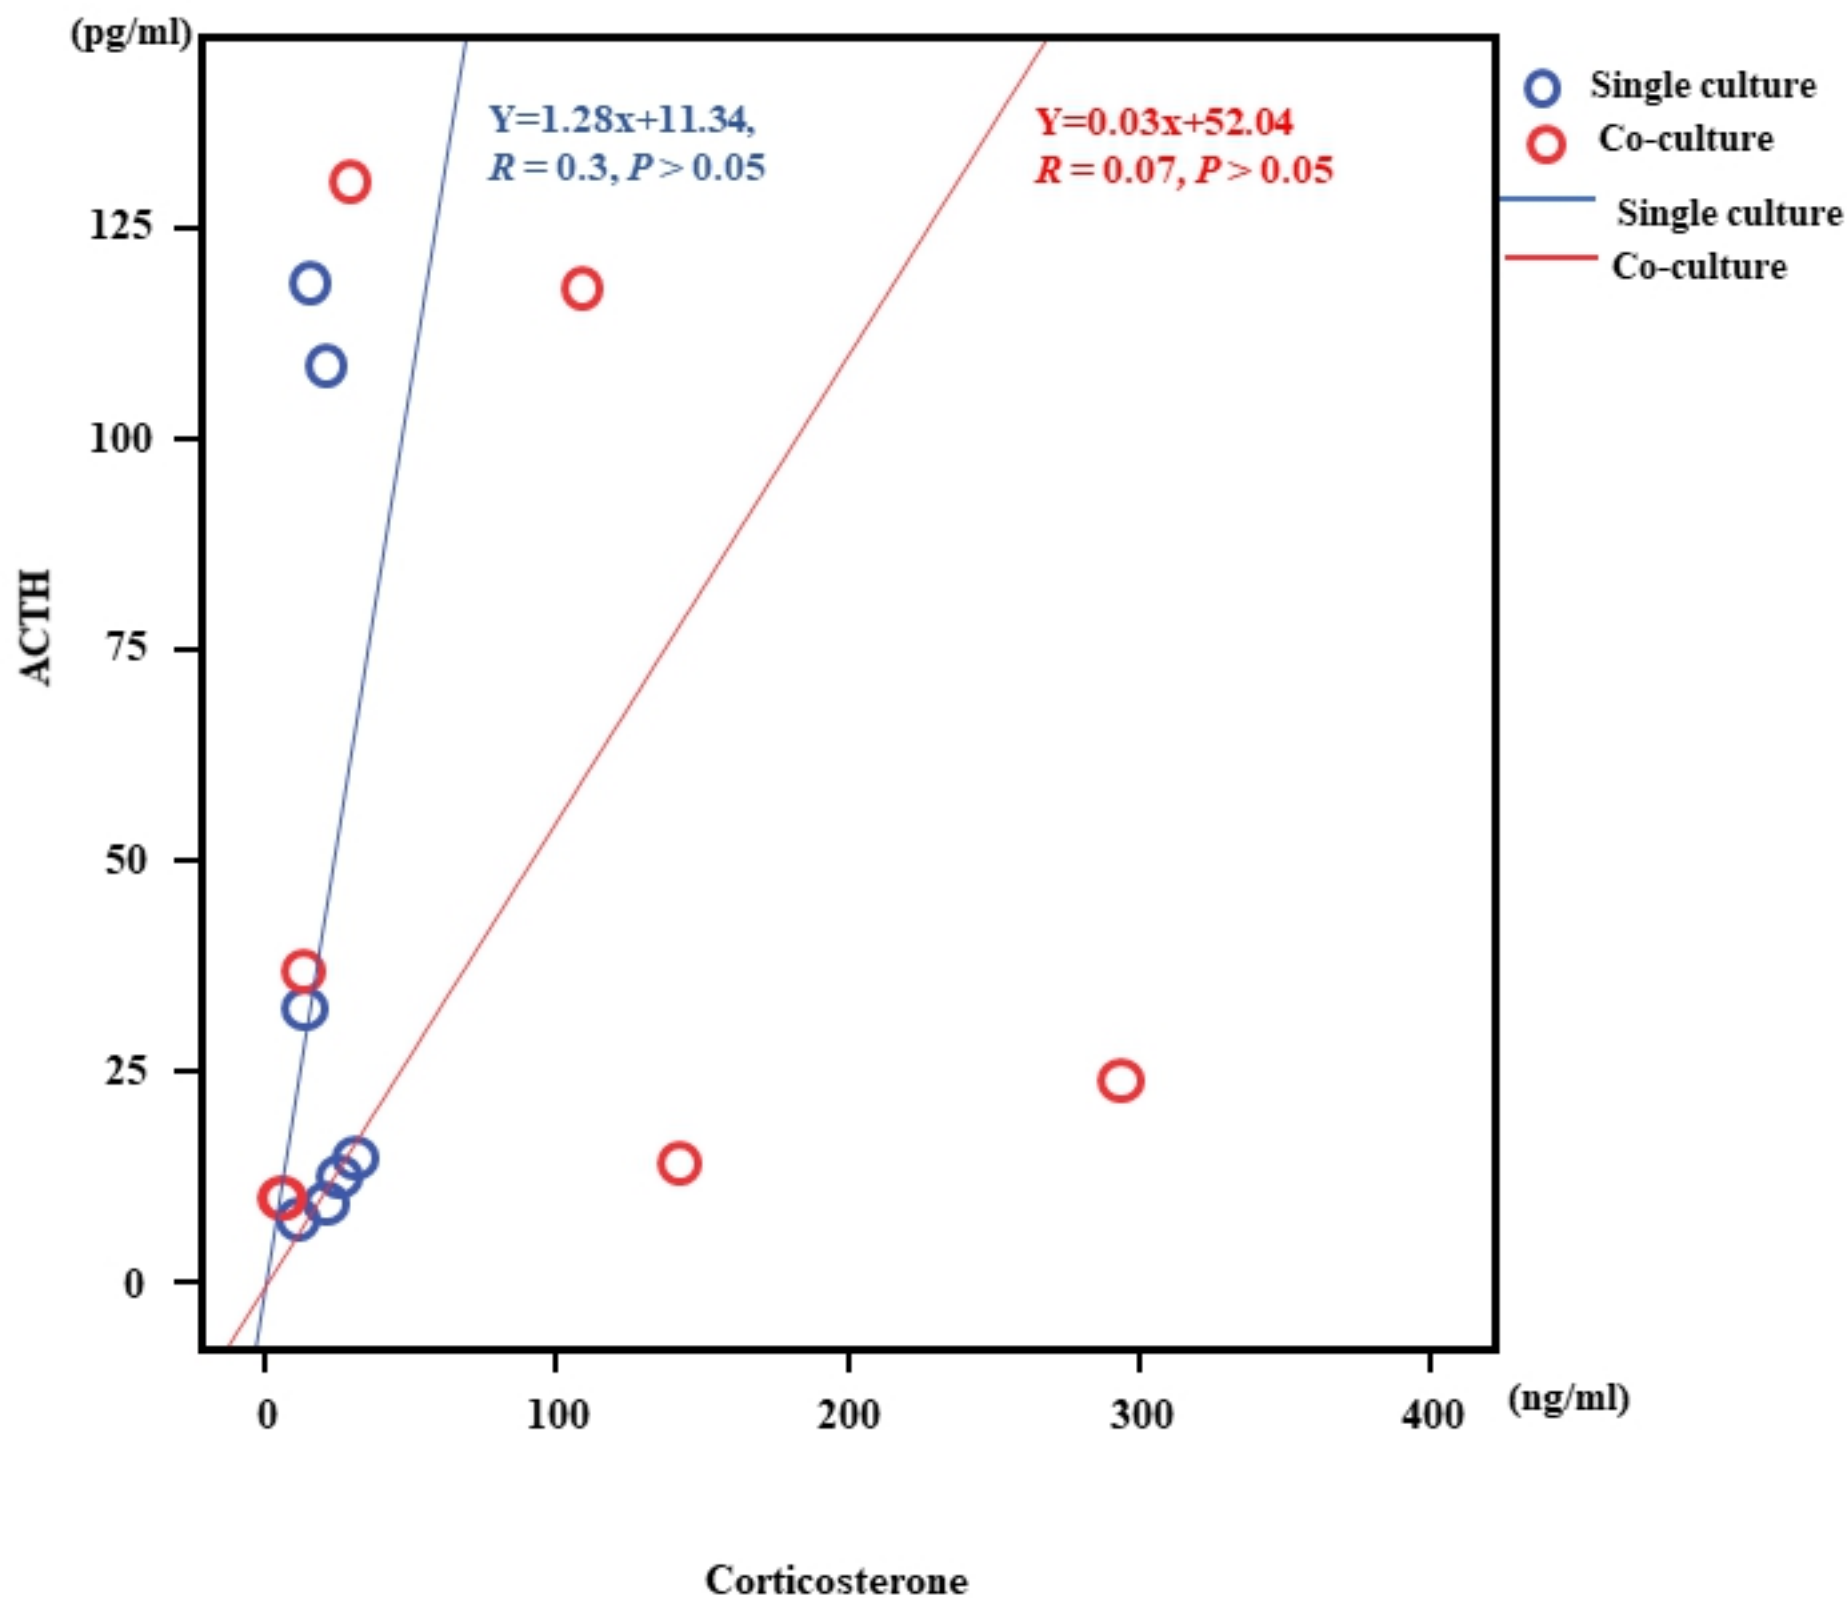

Figure. 7
